# Supplementary material for: Atomic-level structure engineering of metal oxides for high-rate oxygen intercalation pseudocapacitance
Source: PubMed Central journal article supplement — Sci Adv. 2018 Oct 19;4(10):eaau6261. doi: 10.1126/sciadv.aau6261 (PMC6195339; doi:10.1126/sciadv.aau6261), 2018-10-19
Supplement: aau6261_SM.pdf [file aau6261_SM.pdf]

## Supplementary Materials for

### Atomic-level structure engineering of metal oxides for high-rate oxygen intercalation pseudocapacitance

Tao Ling, Pengfei Da, Xueli Zheng, Binghui Ge, Zhenpeng Hu, Mengying Wu, Xi-Wen Du, Wen-Bin Hu, Mietek Jaroniec, Shi-Zhang Qiao\*

\*Corresponding author. Email: s.qiao@adelaide.edu.au

Published 19 October 2018, *Sci. Adv.* **4**, eaau6261 (2018)  
DOI: 10.1126/sciadv.aau6261

#### This PDF file includes:

- Fig. S1. Schematic diagram of the cation exchange methodology for the synthesis of  $Zn_xCo_{1-x}O$  NRs.
- Fig. S2. TEM characterizations of  $Zn_xCo_{1-x}O$  NRs.
- Fig. S3. X-ray diffraction (XRD) spectra of  $Zn_xCo_{1-x}O$  NRs.
- Fig. S4. SEM images of  $Zn_xCo_{1-x}O$  NRs.
- Fig. S5. Composition analysis of a single  $Zn_{0.04}Co_{0.96}O$  NR.
- Fig. S6. HAADF-STEM characterization of the as-exchanged  $Zn_xCo_{1-x}O$  NRs.
- Fig. S7. X-ray photoelectron spectroscopy O 1s spectra of  $Zn_xCo_{1-x}O$  NRs.
- Fig. S8. Schematic illustration of the spatial distribution of O vacancies in a single  $Zn_xCo_{1-x}O$  NR.
- Fig. S9. Analysis of lattice expansion of the surface region of  $Zn_xCo_{1-x}O$  NRs.
- Fig. S10. Characterization of P- $Zn_xCo_{1-x}O$  NRs fabricated directly on CFP.
- Fig. S11. XRD spectrum of P- $Zn_xCo_{1-x}O$  NRs fabricated on CFP.
- Fig. S12. CV curves of P- $Zn_xCo_{1-x}O$  NRs.
- Fig. S13. Atom arrangements on low index planes of CoO.
- Fig. S14. CV curves of  $Zn_xCo_{1-x}O$  NRs collected at scan rates from 5 to 1000  $mV s^{-1}$ .
- Fig. S15. XPS spectra of  $Zn_{0.04}Co_{0.96}O$  NRs before and after the cycling test.
- Fig. S16. Structural characterizations of  $Zn_{0.04}Co_{0.96}O$  NRs after the cycling test.
- Fig. S17. Deconvolution of diffusion-controlled and capacitive-like capacitance in  $Zn_xCo_{1-x}O$  NRs.
- Fig. S18. O-K edge x-ray absorption near-edge structure spectra of  $Zn_xCo_{1-x}O$  NRs before and processed at  $-0.2 V_{Ag/AgCl}$ .
- Fig. S19. Analysis of Co-L<sub>2,3</sub> edge XAS spectra of  $Zn_xCo_{1-x}O$  NRs.
- Fig. S20. Top-view and side-view illustration of O vacancy diffusion path through different surface facets.
- Fig. S21. TEM image of an individual  $Zn_xCo_{1-x}O$  NR.
- Fig. S22. Length distribution of  $Zn_xCo_{1-x}O$  NRs fabricated directly on CFP.

Fig. S23. Diffusion rate calculations for  $Zn_xCo_{1-x}O$  NRs.

Fig. S24. M-S plots for  $Zn_xCo_{1-x}O$  NRs.

Fig. S25. Electrochemical performance of  $Zn_xCo_{1-x}O$  NRs as compared with P- $Zn_xCo_{1-x}O$  NRs.

Fig. S26. CV curve of carbon fiber paper.

Fig. S27. Simulation models of bulk CoO and Zn-doped CoO.

Table S1. Average O vacancy concentrations of  $Zn_xCo_{1-x}O$  NRs.

Table S2. Elemental analysis of  $Zn_{0.04}Co_{0.96}O$  NRs before and after the cycling test.

Table S3. Comparative summary of the performance of  $Zn_xCo_{1-x}O$  NRs in symmetric supercapacitor with the present symmetric supercapacitor and asymmetric supercapacitors.

Note S1. Analysis of the distribution of O vacancy on  $Zn_xCo_{1-x}O$  NRs.

Note S2. Estimation of the theoretical capacitance of P- $Zn_xCo_{1-x}O$  NRs.

Note S3. Estimation of the theoretical capacitance of  $Zn_xCo_{1-x}O$  NRs.

Note S4. Analysis of the oxygen intercalation mechanism in  $Zn_xCo_{1-x}O$  NRs.

Supplementary Methods

## Supplementary Figures

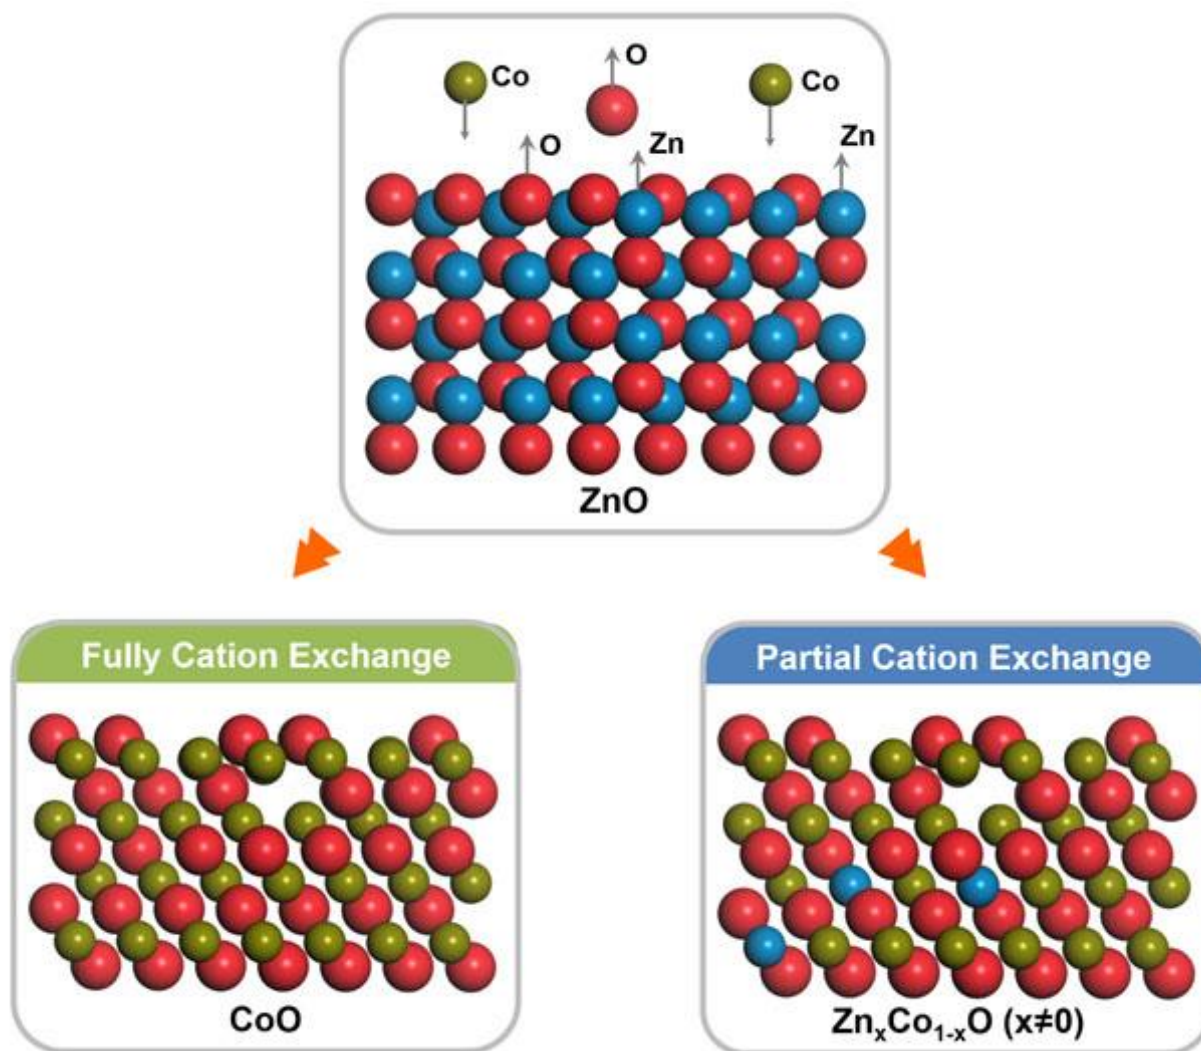

**Fig. S1. Schematic diagram of the cation exchange methodology for the synthesis of Zn<sub>x</sub>Co<sub>1-x</sub>O NRs.** A complete replacement reaction of Zn<sup>2+</sup> by Co<sup>2+</sup> results in CoO NRs, while a partial replacement reaction of Zn<sup>2+</sup> by Co<sup>2+</sup> gives Zn<sub>x</sub>Co<sub>1-x</sub>O (x ≠ 0) NRs.

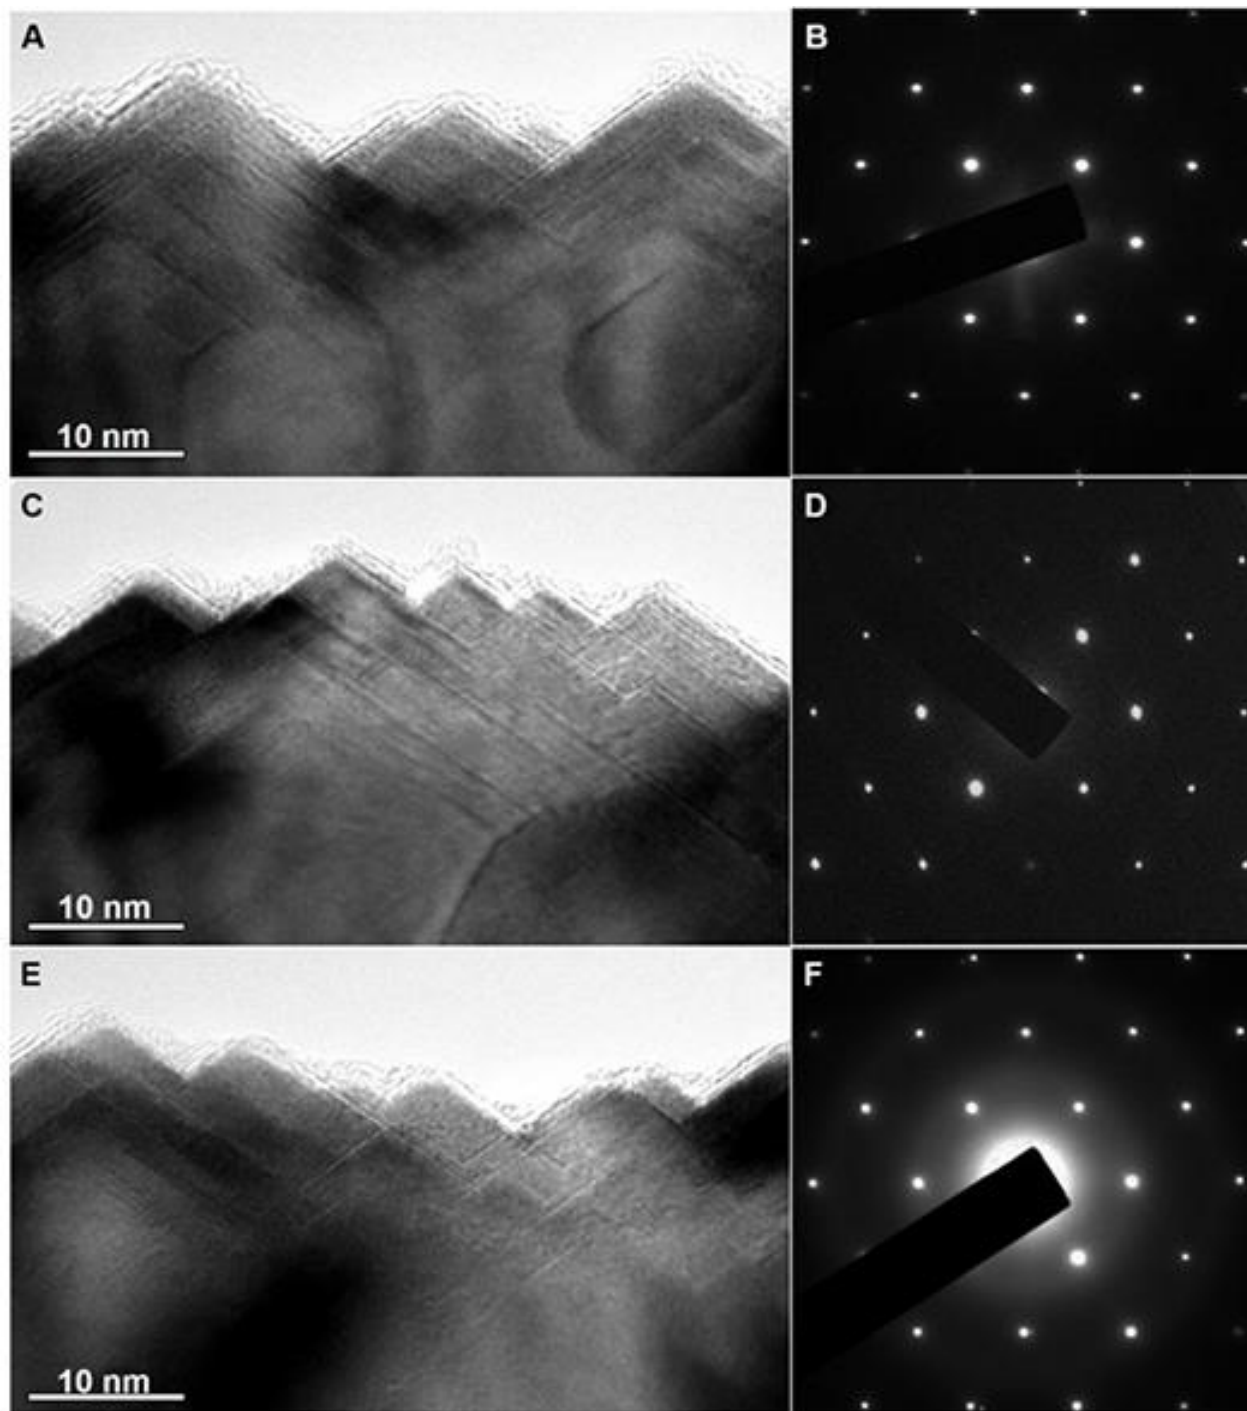

**Fig. S2. TEM characterizations of  $Zn_xCo_{1-x}O$  NRs.** A, C and E, HRTEM image of a single NR of CoO,  $Zn_{0.04}Co_{0.96}O$ , and  $Zn_{0.06}Co_{0.94}O$ , respectively. B, D and F, Selected-area-electron-diffraction (SAED) patterns of CoO,  $Zn_{0.04}Co_{0.96}O$ , and  $Zn_{0.06}Co_{0.94}O$  NR, respectively.

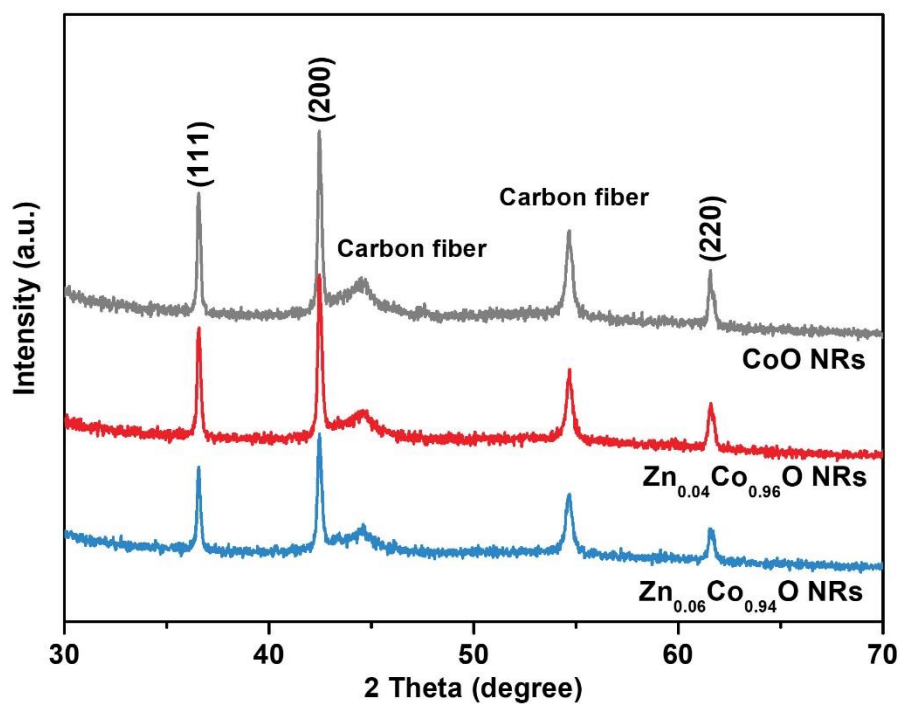

**Fig. S3. X-ray diffraction (XRD) spectra of  $Zn_xCo_{1-x}O$  NRs.** The peaks are assigned to (111), (200) and (220) planes of the face-centered cubic (FCC) phase of CoO, and there are no visible defects, the second phase, or precipitation in the as-exchanged  $Zn_xCo_{1-x}O$  NRs.

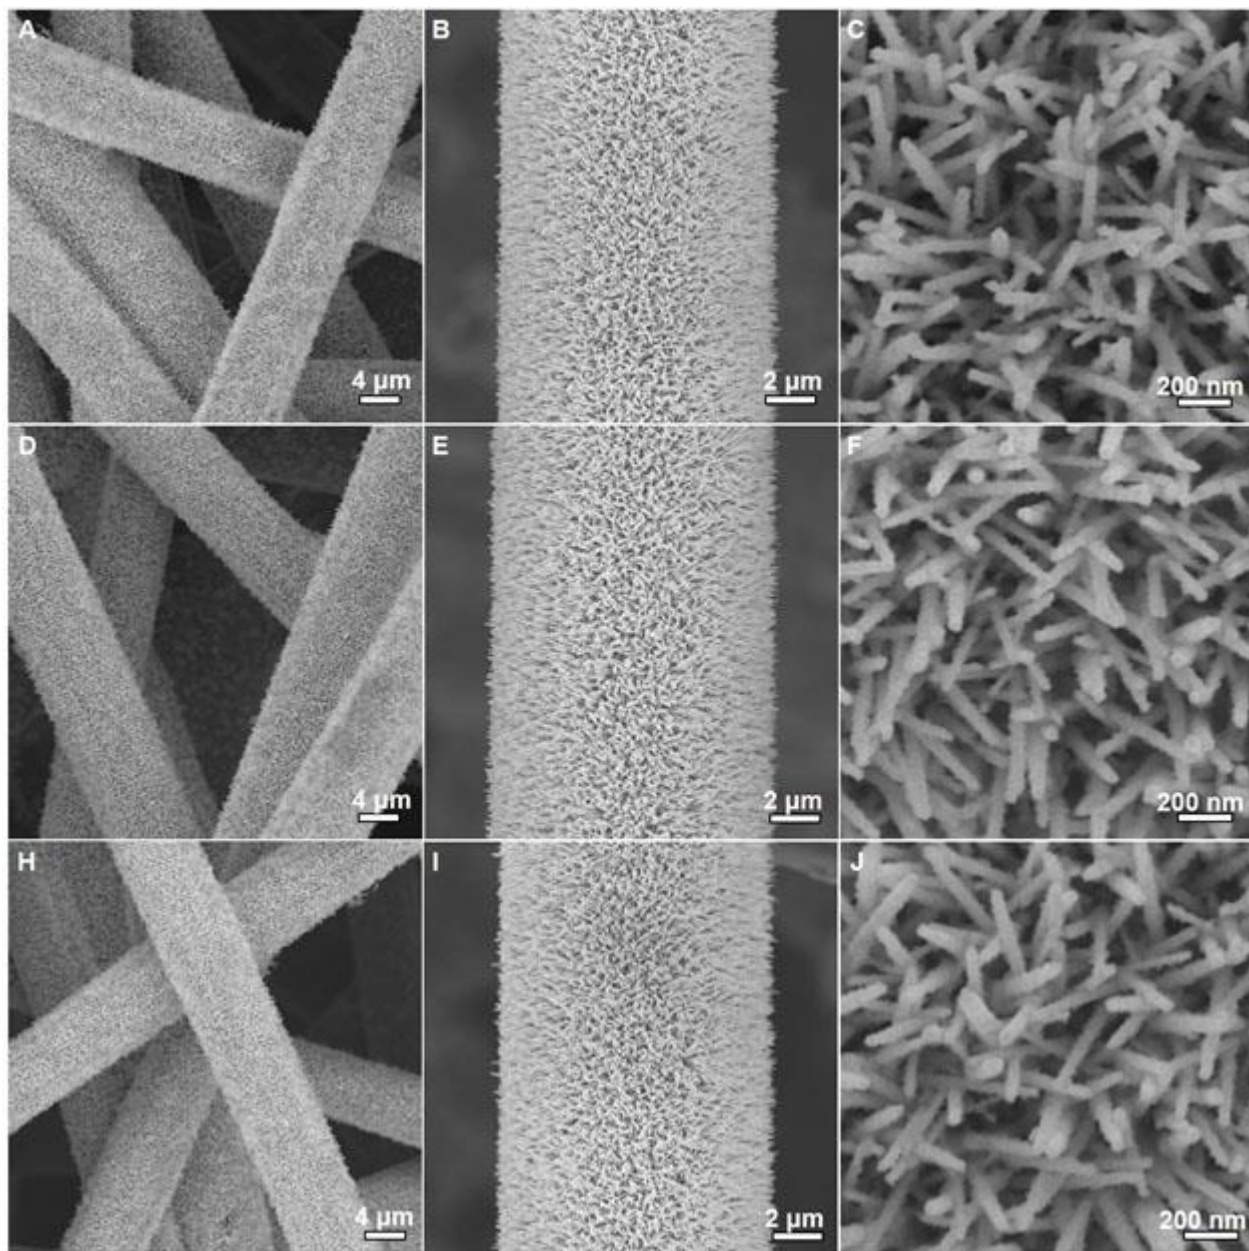

**Fig. S4. SEM images of  $Zn_xCo_{1-x}O$  NRs. A-C, CoO NRs. D-F,  $Zn_{0.04}Co_{0.96}O$  NRs. H-J,  $Zn_{0.06}Co_{0.94}O$  NRs.**

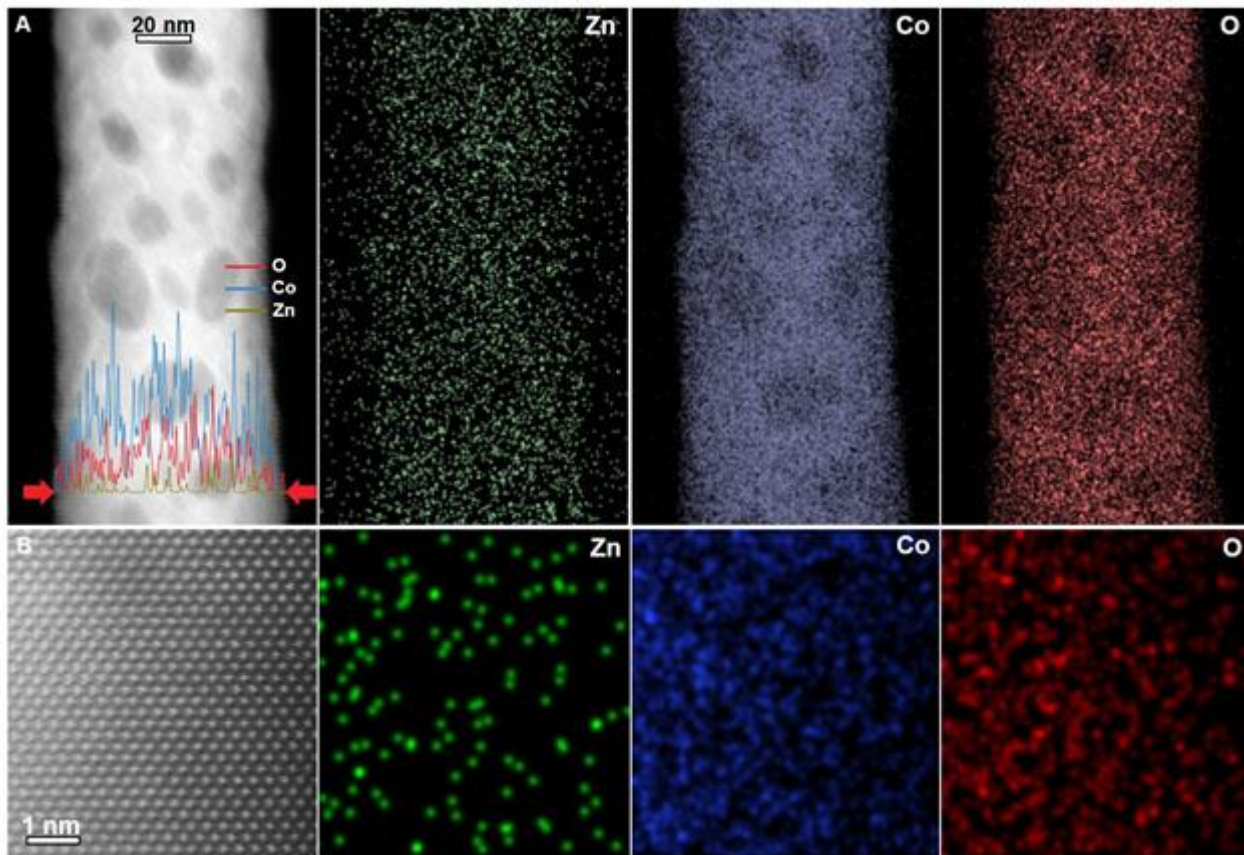

**Fig. S5. Composition analysis of a single  $\text{Zn}_{0.04}\text{Co}_{0.96}\text{O}$  NR.** **A**, HAADF-STEM image and EDS elemental mapping of Zn, Co, and O elements in a single nanorod. In **A**, the linear scanning result shows that O, Co and Zn elements are distributed uniformly across the entire nanorod. **B**, Sub-nm spatial resolution elemental mapping of Zn, Co, and O elements showing uniform distribution of Zn dopant on a single nanorod at the atomic level.

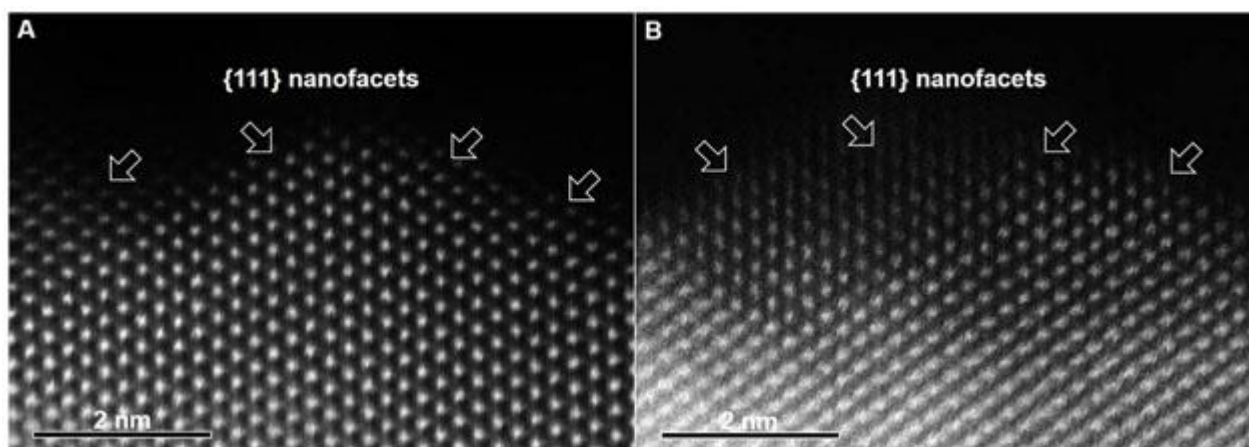

**Fig. S6. HAADF-STEM characterization of the as-exchanged  $\text{Zn}_x\text{Co}_{1-x}\text{O}$  NRs.** **A**,  $\text{CoO}$  NR. **B**,  $\text{Zn}_{0.06}\text{Co}_{0.94}\text{O}$  NR.

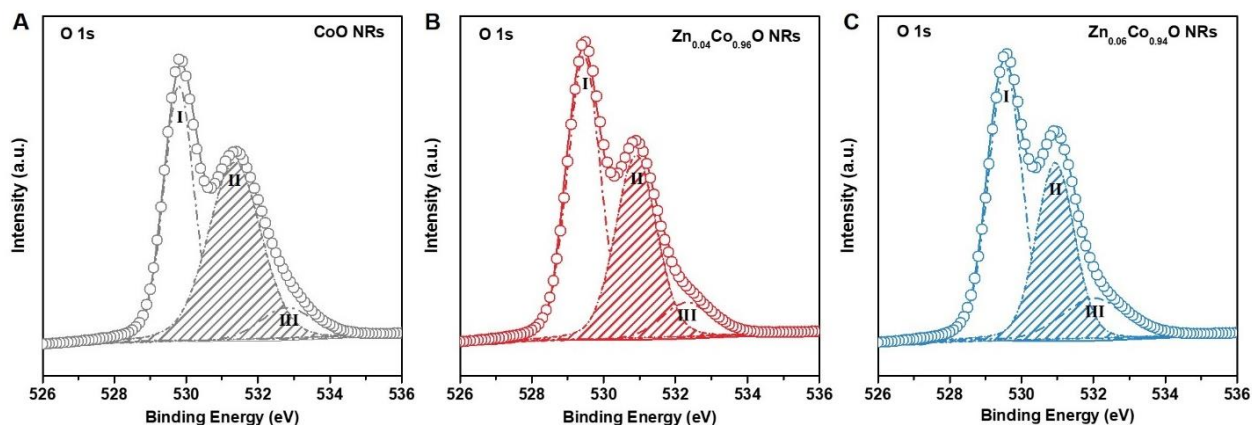

**Fig. S7. X-ray photoelectron spectroscopy O 1s spectra of  $Zn_xCo_{1-x}O$  NRs. A, CoO. B,  $Zn_{0.04}Co_{0.96}O$ . C,  $Zn_{0.06}Co_{0.94}O$ .** The circles and lines are experimental and deconvolution data, respectively. In A-C, the peak with low binding energy (Peak I) is assigned to the lattice oxygen ( $O_L$ ) (*Analyt. Chem.* 1975, 47, 2208-2213), whereas peak II with middle binding energy is attributed to a high number of defect sites with lower oxygen coordination (*J. Electron Spect. Rel. Phen.* 1995, 71, 61-71; *Angew. Chem. Int. Ed.* 2015, 54, 7399-7404), and peak III with high binding energy is associated with surface-adsorbed water molecules (*Angew. Chem. Int. Ed.* 2015, 54, 7399-7404). Evidently, a significant amount of O-vacancies is present on the as-exchanged NRs, and the total quantity of O-vacancies increases in the following order  $Zn_{0.06}Co_{0.94}O$  NRs <  $Zn_{0.04}Co_{0.96}O$  NRs < CoO NRs.

The formation of large quantities of O-vacancies on the surface of  $Zn_xCo_{1-x}O$  NRs arises from the ion exchange process, during which O-vacancies control the communication between the parent ZnO and product  $Zn_xCo_{1-x}O$  NRs (*Chem. Soc. Rev.* 2013, 42, 89-96). Moreover, our previous DFT calculations reveal that the energy of O-vacancies formation on {111} facets is significantly lower than that on {100} and {110} facets (*Nat. Commun.* 2016, 7, 12876). This explains why large amounts of O-vacancies are present on {111} nanofacets of  $Zn_xCo_{1-x}O$  NRs. Overall, the cation exchange drives the formation of {111} nanofacets on the surface of  $Zn_xCo_{1-x}O$  NRs, thus facilitates the creation of O-vacancies, which in turn accelerate the cation exchange process. It should be noted that although engineering of facets (*Science* 2015, 349, 412-416; *Science* 2007, 316, 732-735) or defects (*Nat. Mater.* 2016, 15, 48-53; *Angew. Chem. Int. Ed.* 2013, 52, 2474-2477) have been investigated for many materials, the formation of defects on the desired facets and understanding their role in the capacitive reactions at the atomic level are still lacking.



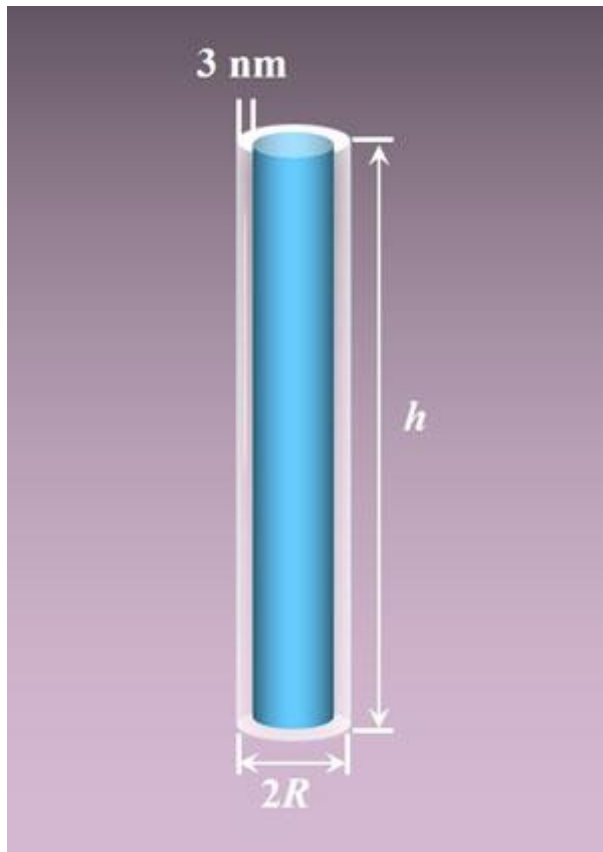

**Fig. S8.** Schematic illustration of the spatial distribution of O vacancies in a single  $\text{Zn}_x\text{Co}_{1-x}\text{O}$  NR.

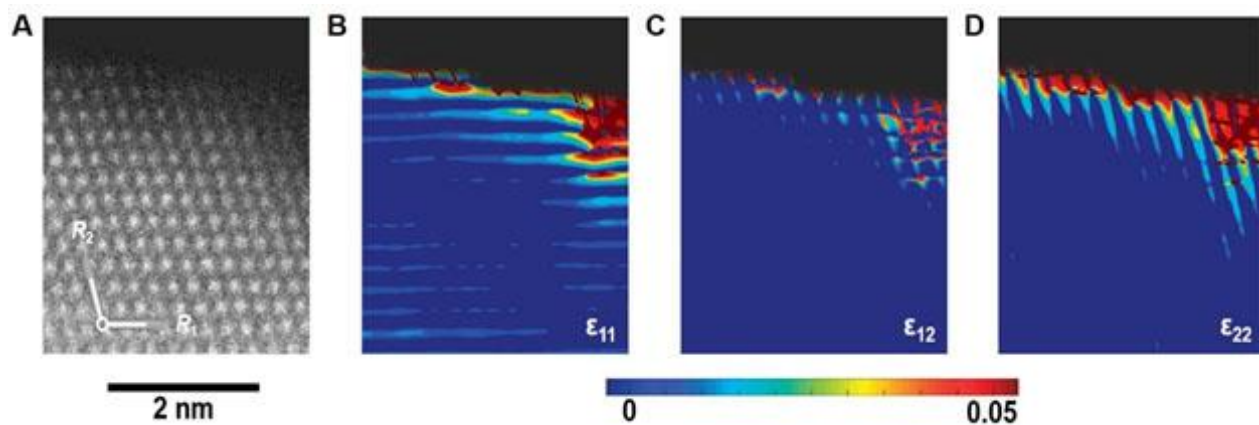

**Fig. S9.** Analysis of lattice expansion of the surface region of  $\text{Zn}_x\text{Co}_{1-x}\text{O}$  NRs. **A**, Atomic resolution HAADF-STEM image of a typical  $\{111\}$  nanofacet exposed on the surface of  $\text{Zn}_x\text{Co}_{1-x}\text{O}$ , indicating the lattice vectors  $\mathbf{R}_1$  and  $\mathbf{R}_2$  used as a reference for the strain analysis. **B-D**, Contour plots of the strain component  $\varepsilon_{11}$  (**B**),  $\varepsilon_{12}$  (**C**) and  $\varepsilon_{22}$  (**D**) relative to the reference values.

Geometric phase analysis (GPA) (*Ultramicroscopy* 1998, 74, 131-146) was used to obtain the strain tensor maps of the surface of an individual  $\text{Zn}_x\text{Co}_{1-x}\text{O}$  NRs. The derivation of the displacement field gives the strain field

$$\varepsilon_{11} = \partial u_1(R) / \partial R_1 \quad (1)$$

$$\varepsilon_{22} = \partial u_2(R) / \partial R_2 \quad (2)$$

$$\varepsilon_{12} = 1/2(\partial u_1(R) / \partial R_2 + \partial u_2(R) / \partial R_1) \quad (3)$$

where  $R$  is a position in  $\mathbf{A}$ ,  $u(R)$  is the vectorial representation of the displacement field. GPA generates strain maps (**B-D**) with color contours directly illustrating the location of the lattice strain, suggesting 3~5% lattice expansion on the surface of  $\text{Zn}_x\text{Co}_{1-x}\text{O}$  NRs.

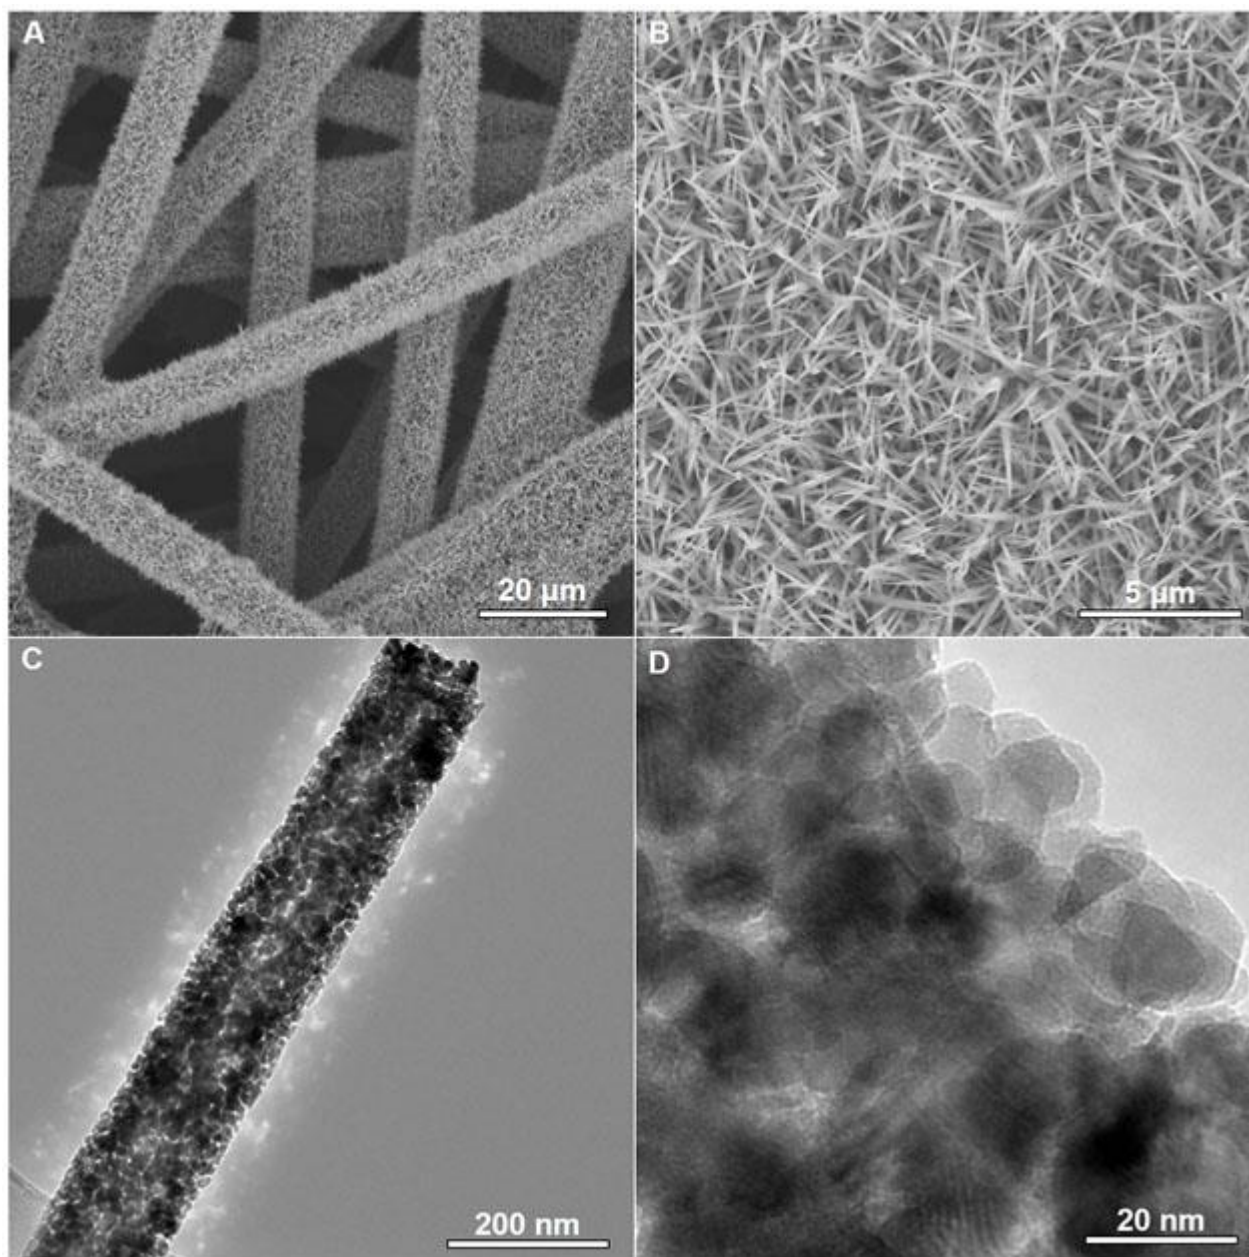

**Fig. S10. Characterization of P-Zn<sub>x</sub>Co<sub>1-x</sub>O NRs fabricated directly on CFP. A and B, Low and high magnification SEM image, respectively. C and D, Low and high magnification TEM image of an individual P-Zn<sub>x</sub>Co<sub>1-x</sub>O NR, respectively.**

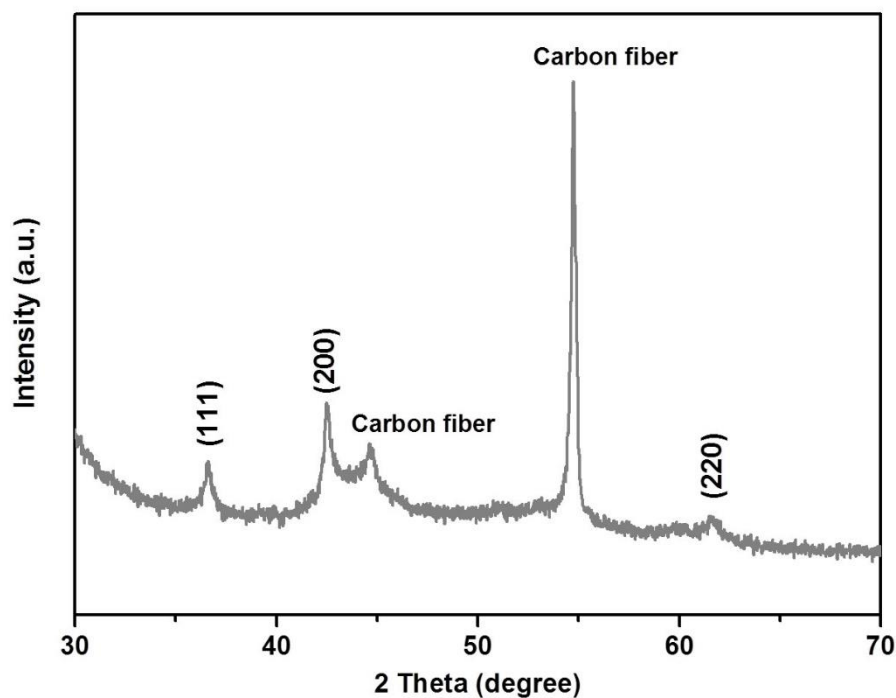

**Fig. S11.** XRD spectrum of P-Zn<sub>x</sub>Co<sub>1-x</sub>O NRs fabricated on CFP. The peaks are attributed to (111), (200) and (220) planes of the FCC phase of CoO.

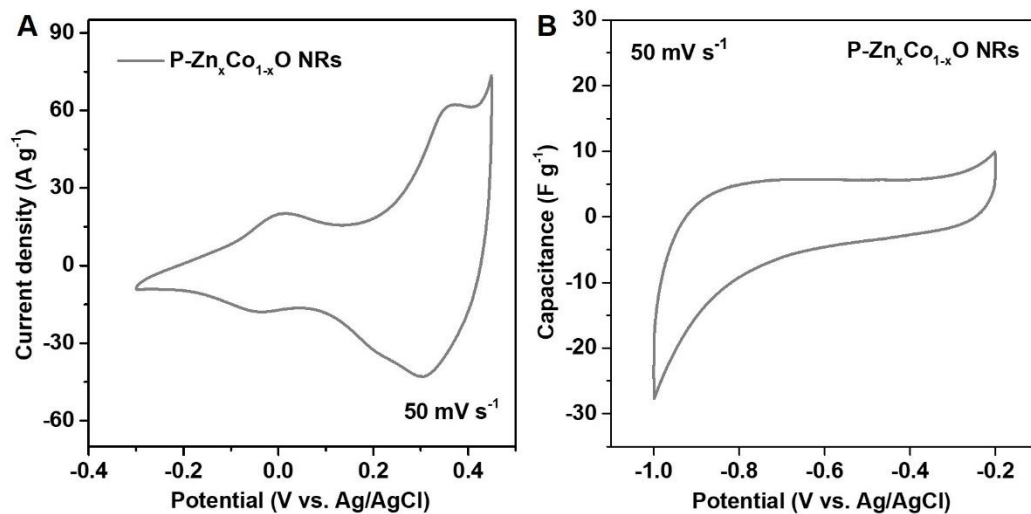

**Fig. S12.** CV curves of P-Zn<sub>x</sub>Co<sub>1-x</sub>O NRs at potential window of (A) -0.4 ~ 0.4 V<sub>Ag/AgCl</sub>, (B) -1.0 ~ -0.2 V<sub>Ag/AgCl</sub>.

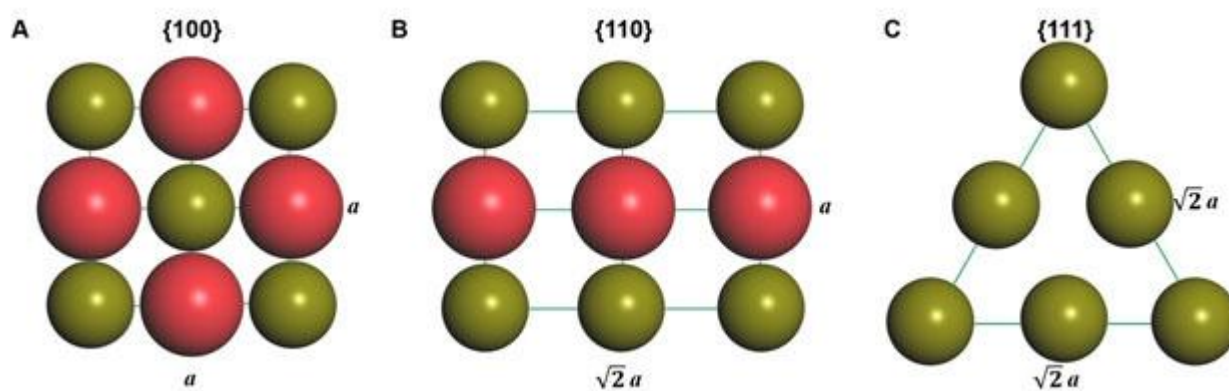

**Fig. S13.** Atom arrangements on low index planes of CoO. **A**,  $\{100\}$ . **B**,  $\{110\}$ . **C**,  $\{111\}$ -Co. Colour codes: bluish yellow and red spheres denote cobalt and oxygen atoms, respectively.

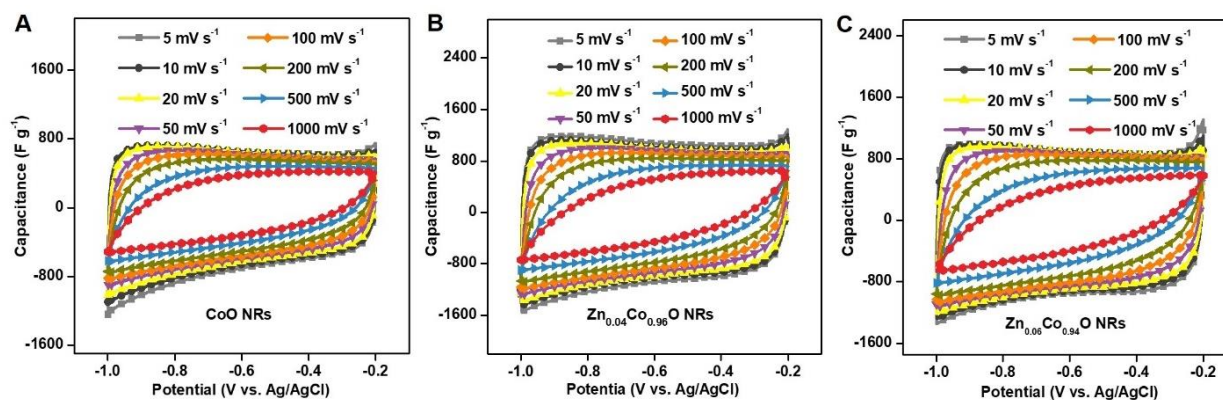

**Fig. S14.** CV curves of  $\text{Zn}_x\text{Co}_{1-x}\text{O}$  NRs collected at scan rates from 5 to  $1000 \text{ mV s}^{-1}$ . **A**, CoO NRs. **B**,  $\text{Zn}_{0.04}\text{Co}_{0.96}\text{O}$  NRs. **C**,  $\text{Zn}_{0.06}\text{Co}_{0.94}\text{O}$  NRs.

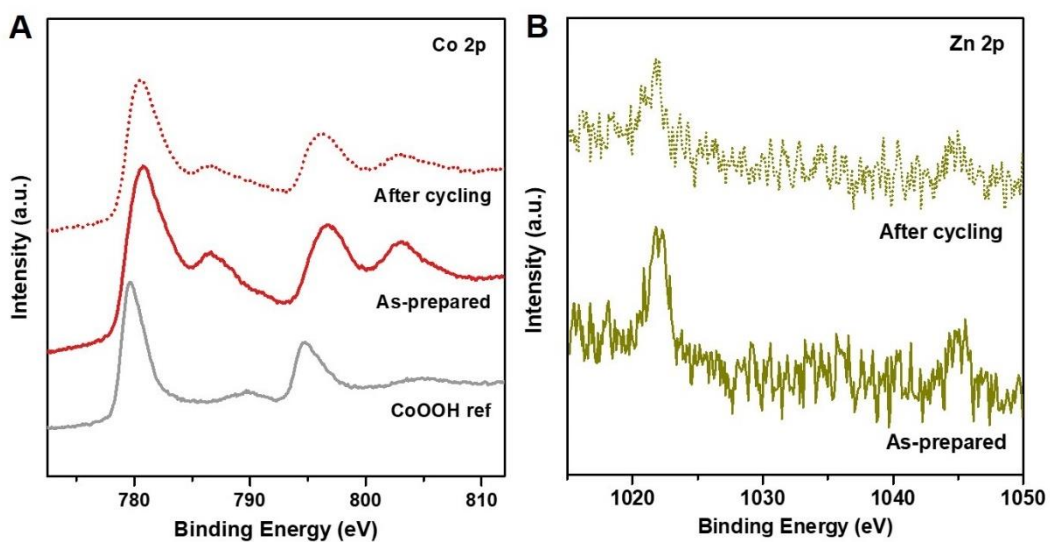

**Fig. S15.** XPS spectra of  $\text{Zn}_{0.04}\text{Co}_{0.96}\text{O}$  NRs before and after the cycling test. **A**, Co 2p. **B**, Zn 2p.

In **A**, CoOOH is introduced as the reference. No noticeable peak shift was observed on the Co 2p XPS spectrum of  $\text{Zn}_{0.04}\text{Co}_{0.96}\text{O}$  NRs after cycling test in comparison to that of the fresh sample, demonstrating the cobalt oxidation state remained at about 2. In addition, the inductively coupled plasma mass spectrometry (ICP-MS) measurements show that the doped Zn-ions are hardly solved into electrolyte during electrochemical cycling (table S2).

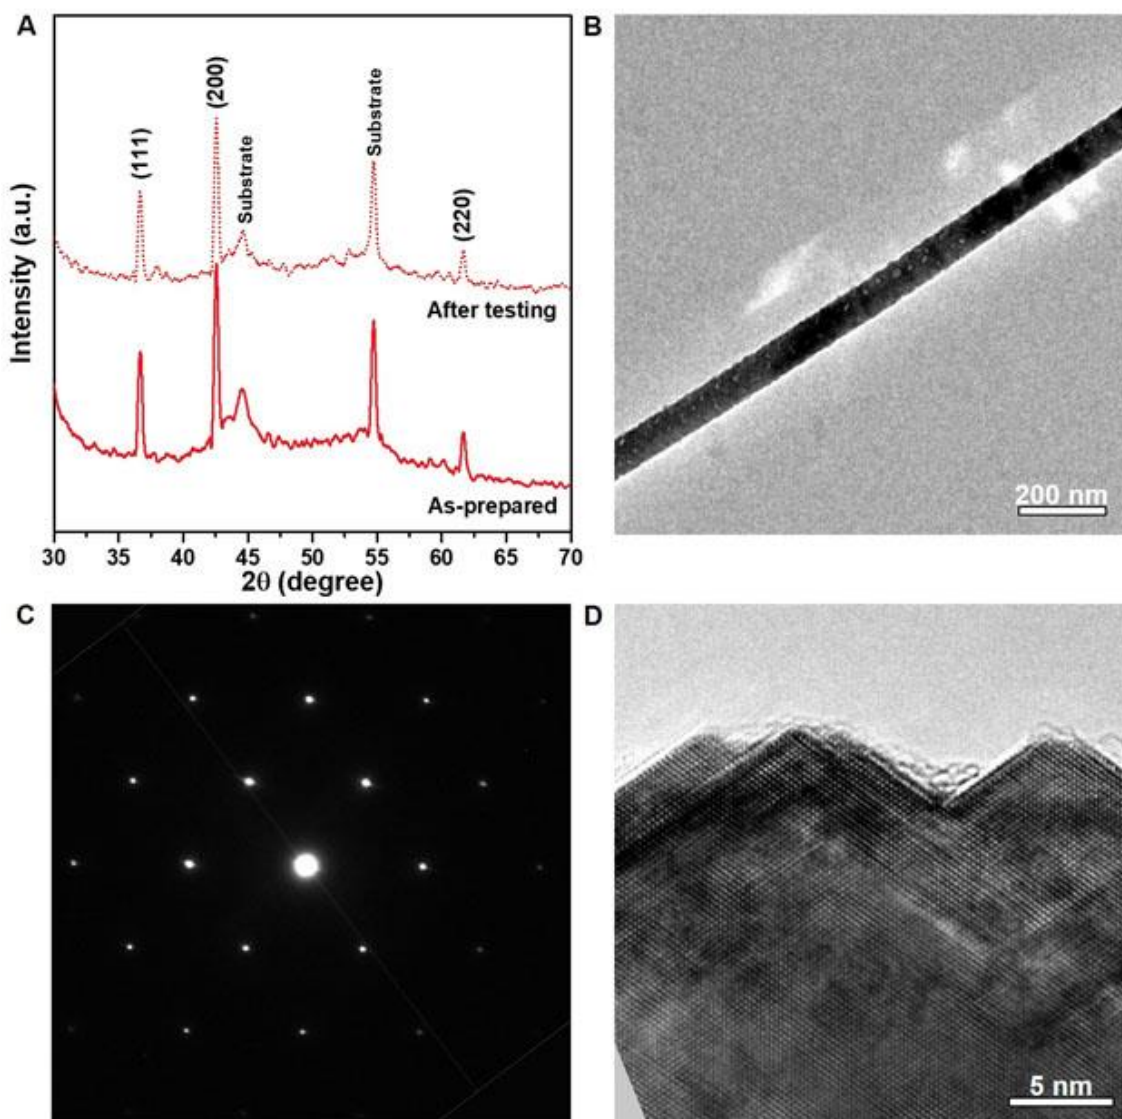

**Fig. S16. Structural characterizations of  $\text{Zn}_{0.04}\text{Co}_{0.96}\text{O}$  NRs after the cycling test. A, XRD. B, low-magnification TEM image. C, SAED pattern. D, HRTEM image.**

The XRD pattern in **a** of  $\text{Zn}_x\text{Co}_{1-x}\text{O}$  NRs after the electrochemical test shows no phase change in comparison to the fresh  $\text{Zn}_x\text{Co}_{1-x}\text{O}$  NRs, which is further supported by the SAED characterization (**C**). Moreover, as displayed clearly in **D**, the  $\{111\}$  nanofacets on the outermost surface of  $\text{Zn}_x\text{Co}_{1-x}\text{O}$  NRs are kept intact after testing. Based on these collective results, we demonstrate that the geometric structure of the as-synthesized  $\text{Zn}_x\text{Co}_{1-x}\text{O}$  NRs are robust enough to withstand the lattice strain generated by the oxygen insertion/extraction processes, which should be mainly attributed to the large amount of O-vacancies and lattice expansion located on the surface and near-surface region of  $\text{Zn}_x\text{Co}_{1-x}\text{O}$  NRs as well as their porous structure (Fig. 2B and fig. S21).

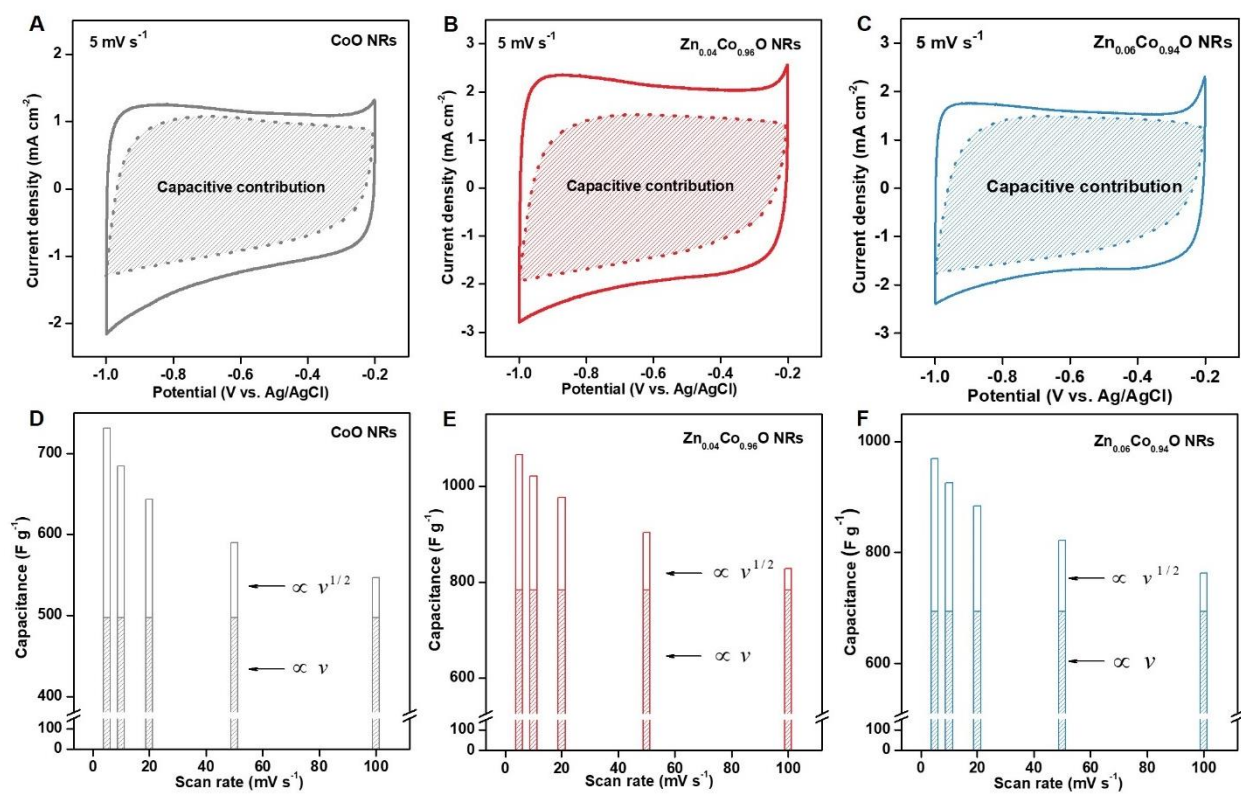

**Fig. S17. Deconvolution of diffusion-controlled and capacitive-like capacitance in  $Zn_xCo_{1-x}O$  NRs.** A-C, CV curves at  $5 \text{ mV s}^{-1}$ . D-F, Deconvolution of charge contribution as a function of scan rates.

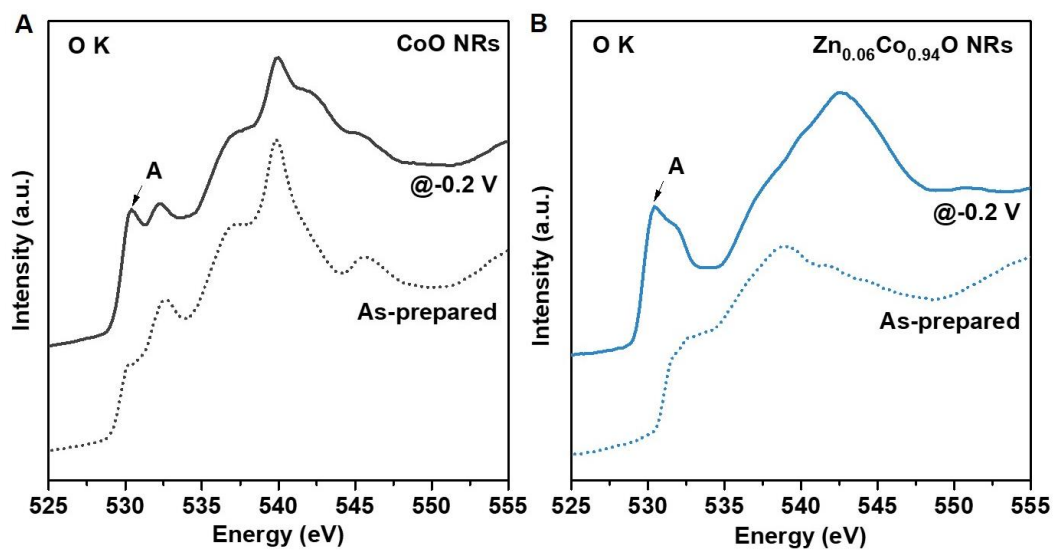

**Fig. S18. O-K edge x-ray absorption near-edge structure spectra of  $Zn_xCo_{1-x}O$  NRs before and processed at  $-0.2 \text{ V}_{Ag/AgCl}$ .** A, CoO NRs. B,  $Zn_{0.06}Co_{0.94}O$  NRs.



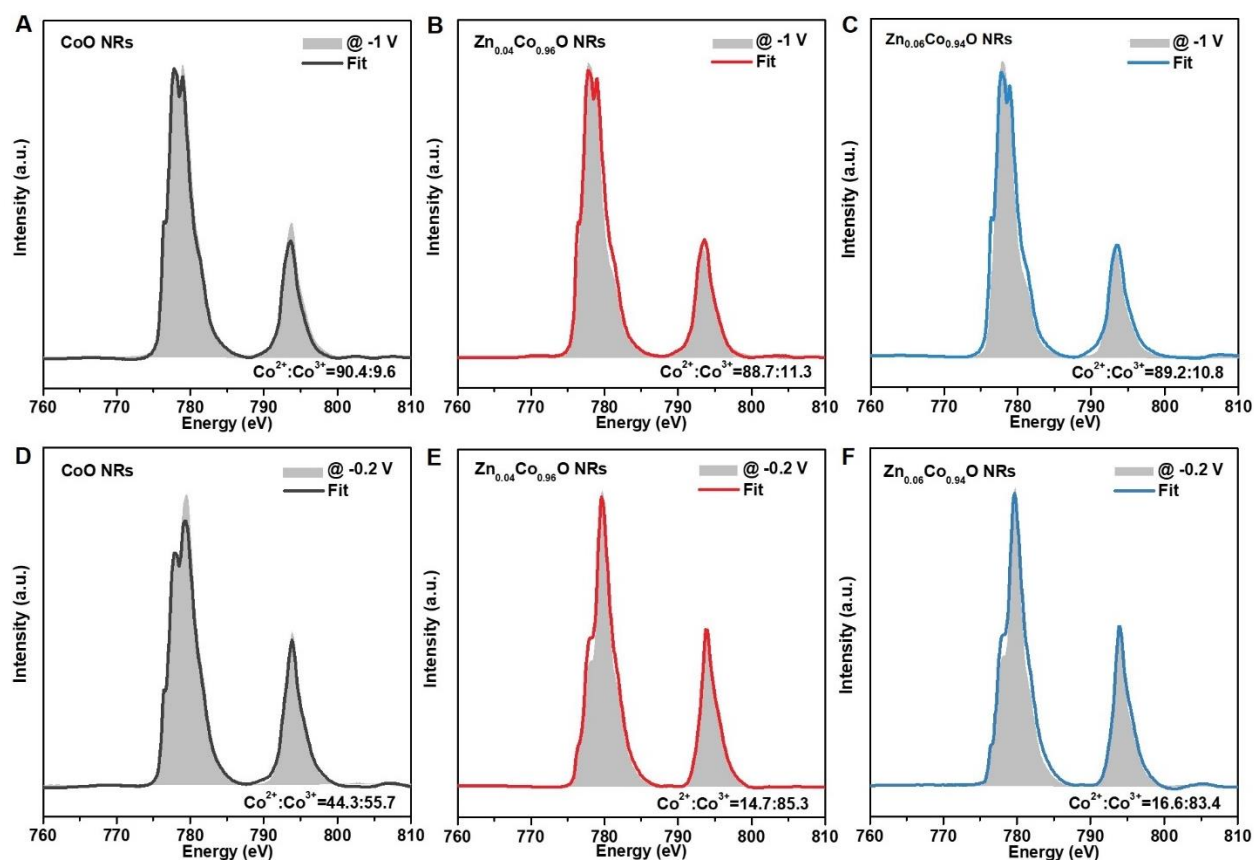

**Fig. S19. Analysis of Co-L<sub>2,3</sub> edge XAS spectra of Zn<sub>x</sub>Co<sub>1-x</sub>O NRs.** Data were fitted using a linear combination of the spectra (*Science*, 2016, 352, 333-337) from references CoO (for Co<sup>2+</sup>) and Co<sub>2</sub>O<sub>3</sub> (for Co<sup>3+</sup>). **A** and **D**, CoO NRs at -1 and -0.2 V<sub>Ag/AgCl</sub>, respectively. **B** and **E**, Zn<sub>0.04</sub>Co<sub>0.96</sub>O NRs at -1 and -0.2 V<sub>Ag/AgCl</sub>, respectively. **C** and **F**, Zn<sub>0.06</sub>Co<sub>0.94</sub>O NRs at -1 and -0.2 V<sub>Ag/AgCl</sub>, respectively.

The average Co oxidation state change for CoO NRs, Zn<sub>0.04</sub>Co<sub>0.96</sub>O NRs, and Zn<sub>0.06</sub>Co<sub>0.94</sub>O NRs is about 0.46, 0.74, and 0.72, respectively (i.e., by 0.46, 0.74, and 0.72  $\bar{e}$  per Co atom, respectively). It is noteworthy that the small difference in the oxidation state of cobalt present in Zn<sub>0.04</sub>Co<sub>0.96</sub>O and Zn<sub>0.06</sub>Co<sub>0.94</sub>O NRs is due to the tiny difference in the O-vacancy concentrations (table S1).

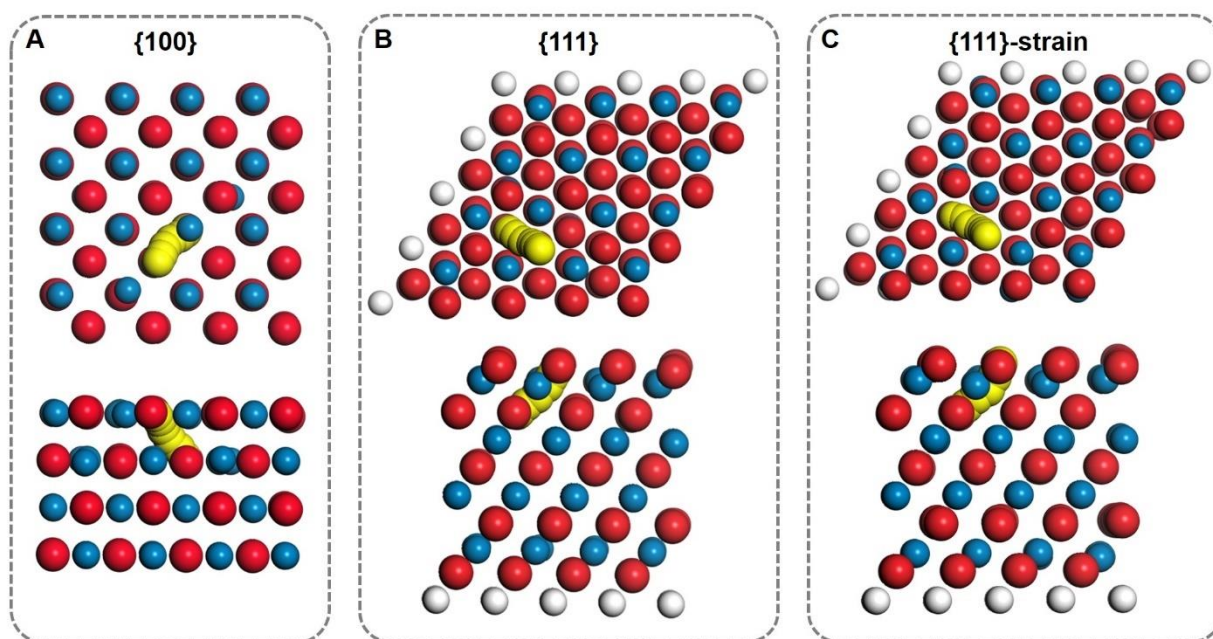

**Fig. S20. Top-view and side-view illustration of O vacancy diffusion path through different surface facets. A, {100}. B, {111}. C, {111} with 3% lattice expansion.** To model the O-vacancy diffusion through {100} surface, four Co-O layers (127 atoms) with a supercell size of  $a=b=12.07\text{\AA}$ ,  $c=21.80\text{\AA}$ ,  $\alpha=\beta=\gamma=90^\circ$  were employed. The {111} model consists of four Co layers, five O layers and one H layer (159 atoms) with  $a=b=12.07\text{\AA}$ ,  $c=29.78\text{\AA}$ ,  $\alpha=\beta=90^\circ$ ,  $\gamma=120^\circ$ . For the strained {111} structure, the lattice parameters of the unit cell were elongated by 3%. Colour codes: blue and red spheres denote respectively cobalt and oxygen atoms, and yellow and white spheres denote respective O-vacancy and hydrogen atoms.

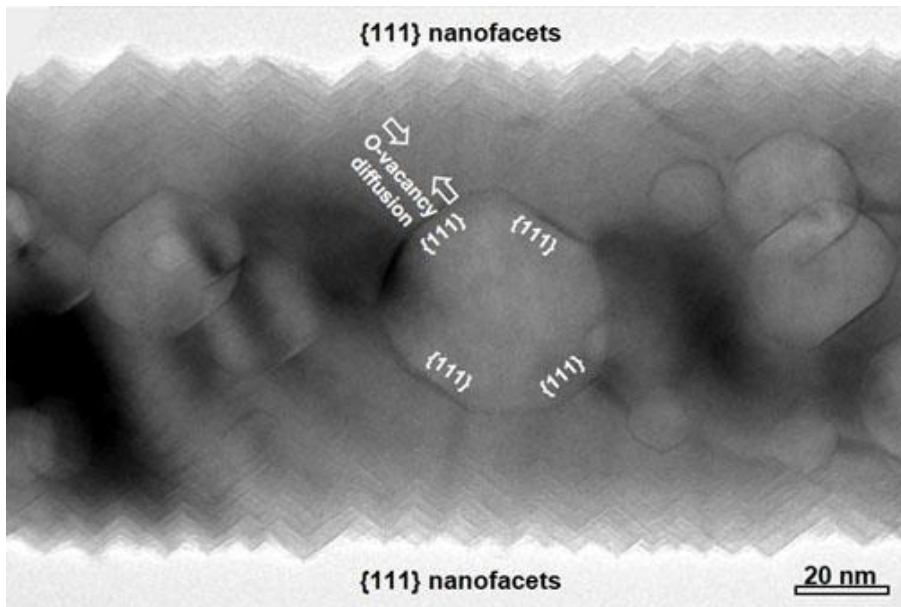

**Fig. S21. TEM image of an individual Zn<sub>x</sub>Co<sub>1-x</sub>O NR.** As can be seen, numerous nanopores with well-defined {111} sidewalls are present inside Zn<sub>x</sub>Co<sub>1-x</sub>O NRs.

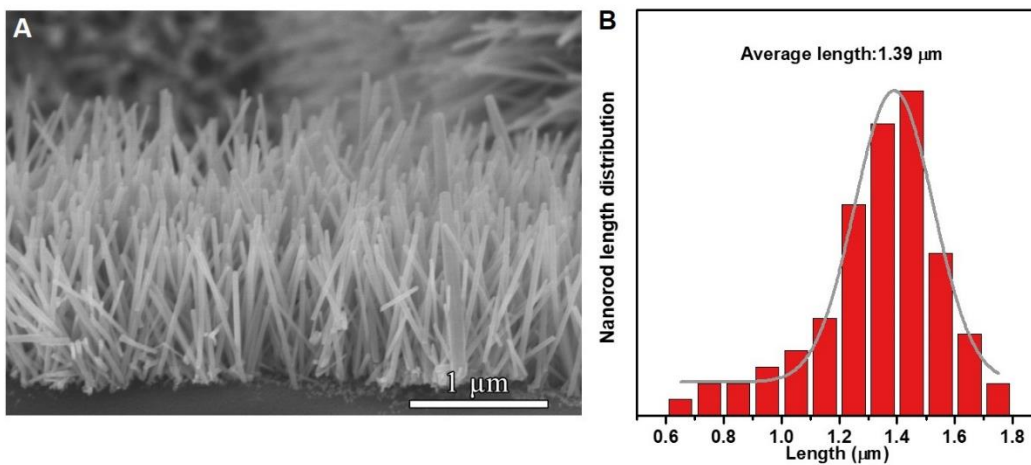

**Fig. S22. Length distribution of Zn<sub>x</sub>Co<sub>1-x</sub>O NRs fabricated directly on CFP.** **A**, Cross-section SEM image. **B**, Length histogram of Zn<sub>x</sub>Co<sub>1-x</sub>O NRs and corresponding Gaussian fit.

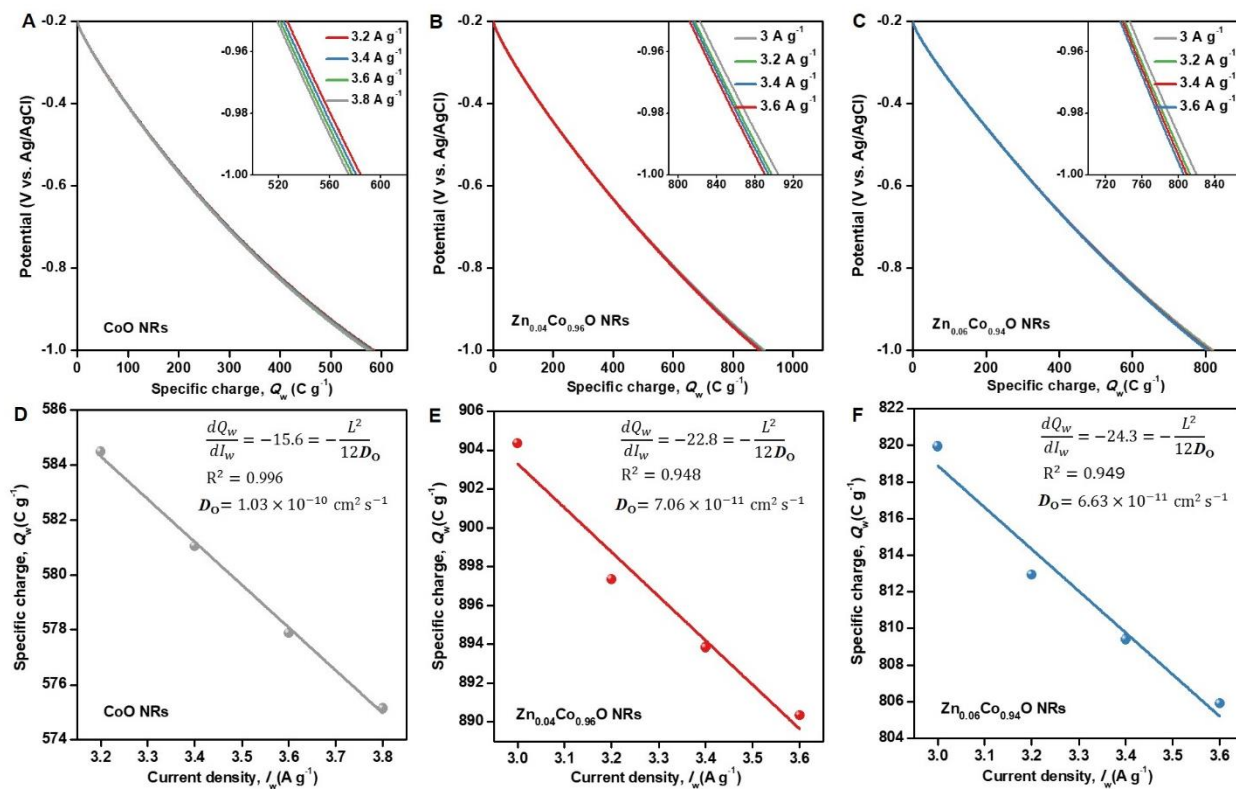

**Fig. S23. Diffusion rate calculations for Zn<sub>x</sub>Co<sub>1-x</sub>O NRs. A and D, CoO NRs. B and E, Zn<sub>0.04</sub>Co<sub>0.96</sub>O NRs. C and F, Zn<sub>0.06</sub>Co<sub>0.94</sub>O NRs.**

The potential range shown in A, B, C is the corresponding potential window in galvanostatic charge-discharge plots. The chemical diffusion coefficient of oxygen ( $D_O$ ) was calculated using the following equation (*Sci. Rep.* 2012, 2, 601)

$$\frac{dQ_w}{dI_w} = -\frac{L^2}{12D_O} \quad (4)$$

where  $L$  is the average length of Zn<sub>x</sub>Co<sub>1-x</sub>O NRs obtained from fig. S22.

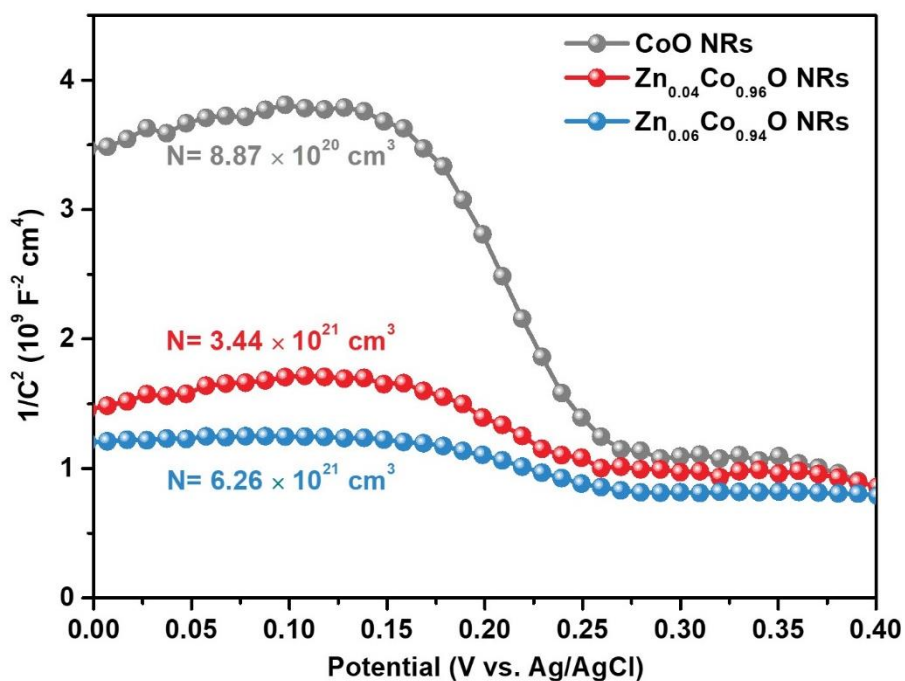

**Fig. S24. M-S plots for  $Zn_xCo_{1-x}O$  NRs.** The hole density ( $N$ ) can be calculated from the slopes of the M-S plots using the following equation (*Electroanal. Chem. Interfacial* 1975, 65, 163-175)

$$\frac{dC^{-2}}{dV} = \frac{-2}{q\epsilon_0\epsilon_rNA^2} \quad (5)$$

where  $A$  is the surface area of the sample studied,  $\epsilon_r$  is the dielectric constant of CoO with the value of 5.4.

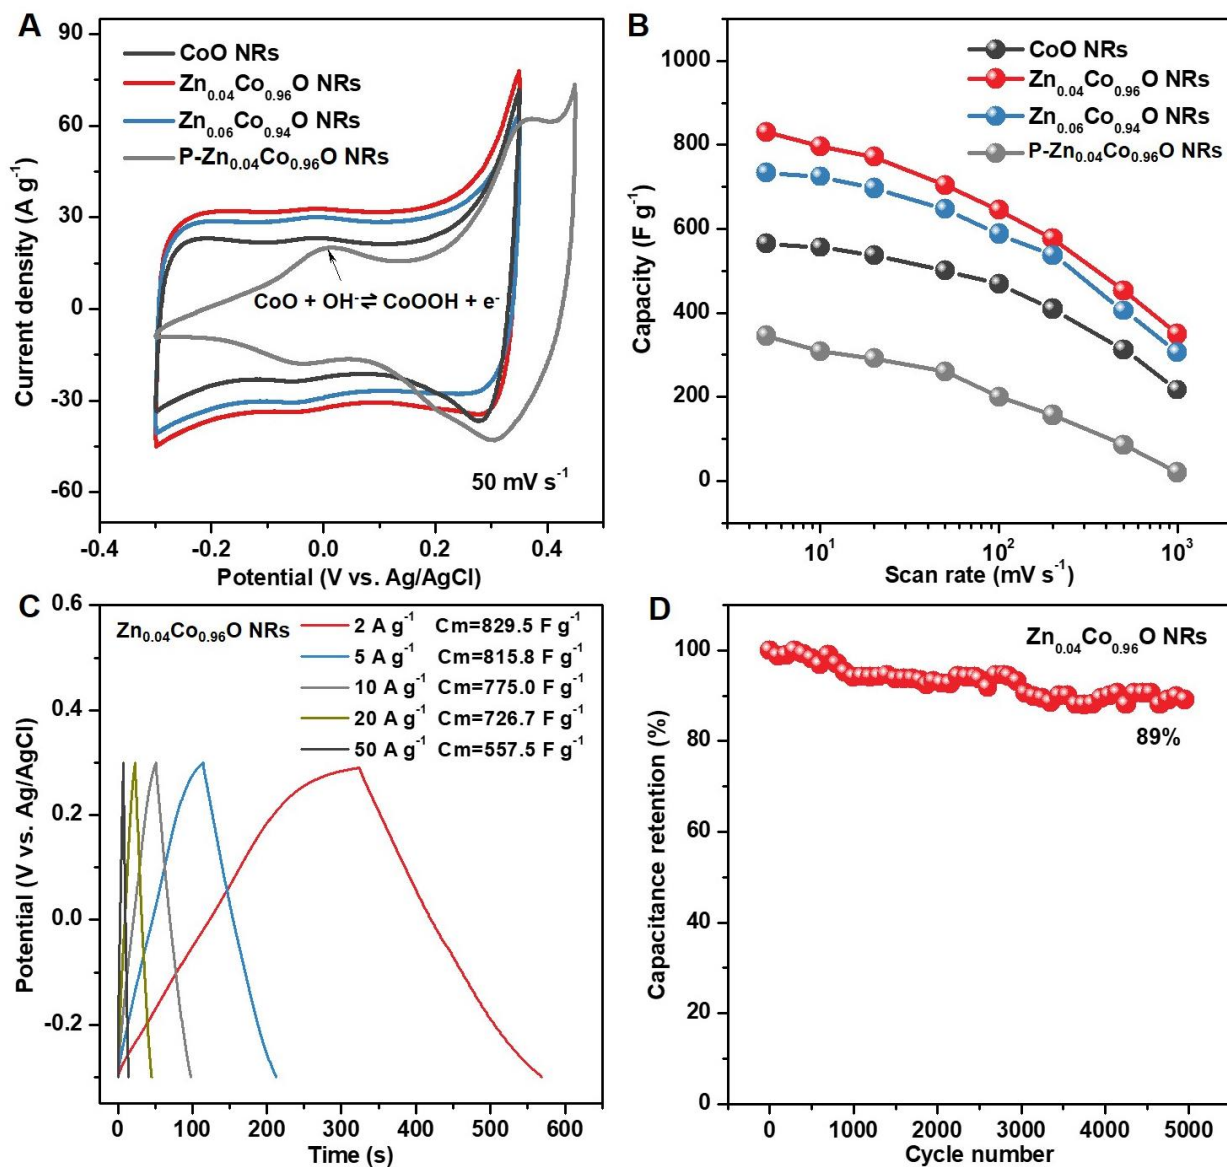

**Fig. S25. Electrochemical performance of  $\text{Zn}_x\text{Co}_{1-x}\text{O}$  NRs as compared with P- $\text{Zn}_x\text{Co}_{1-x}\text{O}$  NRs. A, CV curves at  $50 \text{ mV s}^{-1}$ . B, Specific capacity as a function of sweep rate between 5 and  $1000 \text{ mV s}^{-1}$ . C, Galvanostatic cycling profiles of  $\text{Zn}_{0.04}\text{Co}_{0.96}\text{O}$  NRs collected at 2, 5, 10, 20, and  $50 \text{ A g}^{-1}$ . D, Capacitance retention of  $\text{Zn}_{0.04}\text{Co}_{0.96}\text{O}$  NRs by galvanostatic cycling at  $10 \text{ A g}^{-1}$ .**

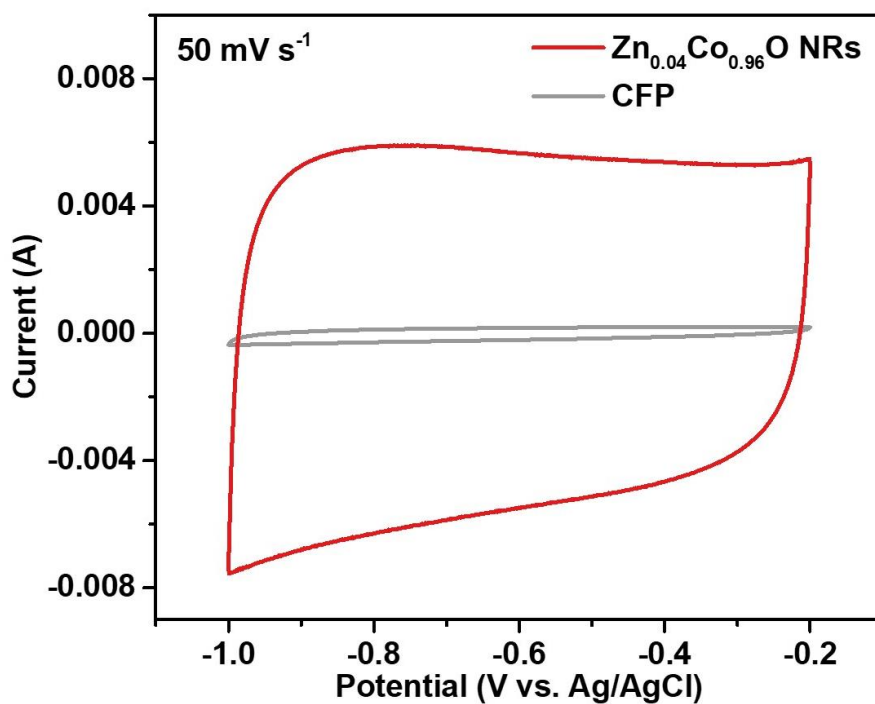

Fig. S26. CV curve of carbon fiber paper.

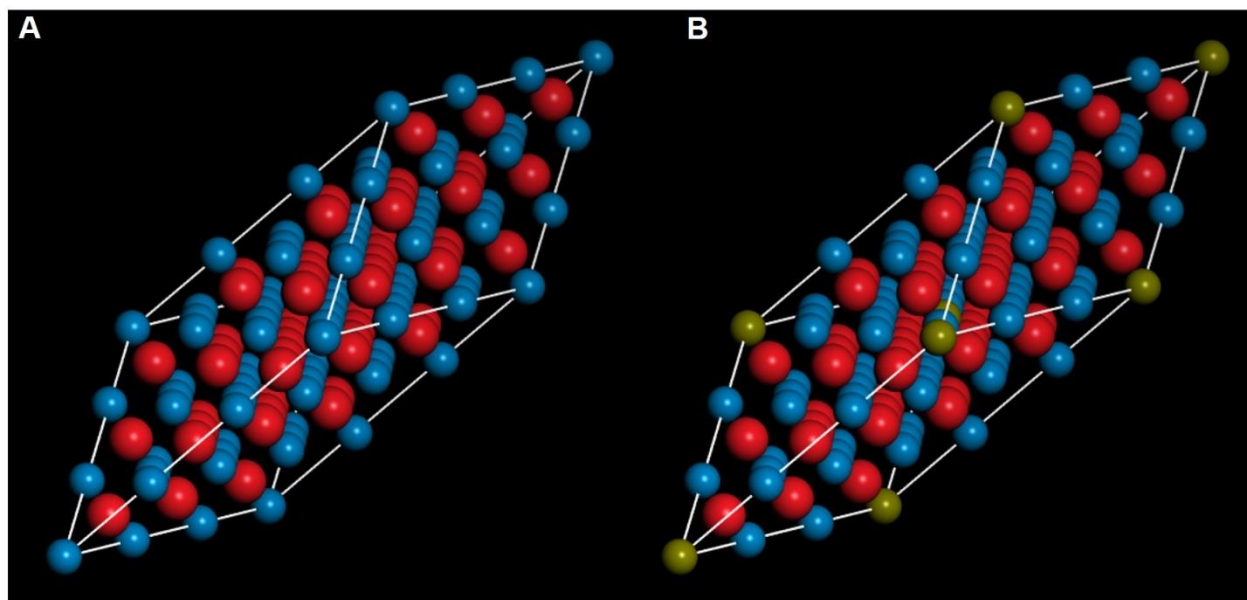

Fig. S27. Simulation models of bulk (A) CoO and (B) Zn-doped CoO. In B, the Zn dopant concentration is 3.7%. Colour codes: blue and red spheres denote respectively cobalt and oxygen atoms, and bluish yellow spheres denote Zn atoms.

## Supplementary Tables

**Table S1. Average O vacancy concentrations of  $\text{Zn}_x\text{Co}_{1-x}\text{O}$  NRs measured by ICP-MS measurements.**

| Sample                                         | Exchange temperature ( $^{\circ}\text{C}$ ) | Bulk O-vacancy concentration, $\delta_{\text{bulk}}$ |
|------------------------------------------------|---------------------------------------------|------------------------------------------------------|
| CoO NRs                                        | 625                                         | 0.05                                                 |
| $\text{Zn}_{0.04}\text{Co}_{0.96}\text{O}$ NRs | 600                                         | 0.034                                                |
| $\text{Zn}_{0.06}\text{Co}_{0.94}\text{O}$ NRs | 575                                         | 0.022                                                |

**Table S2. Elemental analysis of  $\text{Zn}_{0.04}\text{Co}_{0.96}\text{O}$  NRs before and after the cycling test using ICP-MS measurements.**

| Sample                                                            | Mass of $\text{Co}^{2+}$ ( $\text{mg cm}^{-2}$ ) | Mass of $\text{Zn}^{2+}$ ( $\text{mg cm}^{-2}$ ) | Total mass ( $\text{mg cm}^{-2}$ ) |
|-------------------------------------------------------------------|--------------------------------------------------|--------------------------------------------------|------------------------------------|
| As-prepared $\text{Zn}_{0.04}\text{Co}_{0.96}\text{O}$ NRs        | 0.246                                            | 0.0105                                           | 0.326                              |
| $\text{Zn}_{0.04}\text{Co}_{0.96}\text{O}$ NRs After cycling test | 0.242                                            | 0.0097                                           | 0.320                              |



**Table S3. Comparative summary of the performance of  $Zn_xCo_{1-x}O$  NRs in symmetric supercapacitor with the present symmetric supercapacitor and asymmetric supercapacitors.**

| Capacitive materials       | Potential window (V) | Capacitance ( $F g^{-1}$ ) | Device configuration                | Energy density ( $Wh kg^{-1}$ ) | Power density ( $kW kg^{-1}$ ) | Reference                            |
|----------------------------|----------------------|----------------------------|-------------------------------------|---------------------------------|--------------------------------|--------------------------------------|
| $Zn_xCo_{1-x}O$            | 1.5                  | 450 @ 1 $V s^{-1}$         | SC- $Zn_xCo_{1-x}O$                 | 67.3                            | 1.67                           | This work                            |
| $LaMnO_3$                  | 2                    | 400 @ 0.1 $V s^{-1}$       | SC- $LaMnO_3$                       | 40.9                            | 0.36                           | <i>Nat. Mater.</i> 2014, 13, 726     |
| HGF <sup>a</sup>           | 3.5                  | 310 @ 1 $A g^{-1}$         | SC-HGF                              | 34.6                            | 0.28                           | <i>Nat. Commun.</i> 2014, 5, 4554    |
| $TiS_2/CNT$ <sup>b</sup>   | 3                    | 120 @ 0.01 $V s^{-1}$      | SC- $TiS_2/CNT$                     | 60.9                            | 0.07                           | <i>Adv. Mater.</i> 2018, 30, 1704754 |
| OMFLC-N <sup>c</sup>       | 1.2                  | 855 @ 1 $A g^{-1}$         | SC-OMFLC-N                          | 41.0                            | 26.0                           | <i>Science</i> , 2015, 350, 1508     |
| NPG <sup>d</sup> / $MnO_2$ | 0.8                  | 1145 @ 0.05 $V s^{-1}$     | SC-NPG/ $MnO_2$                     | 57                              | 16                             | <i>Nat. Nanotech.</i> 2011, 6, 232   |
| Ni-Co oxide                | 0.45                 | 1900 @ 2 $A g^{-1}$        | ASC-Ni-Co//G/MMCS <sup>e</sup>      | 52.6                            | 1.60                           | <i>Adv. Mater.</i> 2017, 29, 1605902 |
| Amorphous $Ni(OH)_2$       | 0.5                  | 2188 @ 0.001 $V s^{-1}$    | ASC- $Ni(OH)_2$ // Activated carbon | 35.7                            | 0.49                           | <i>Nat. Commun.</i> 2013, 4, 1894    |
| $Fe_2O_3$                  | 1.0                  | 290 @ 3.2 $V s^{-1}$       | ASC- $Fe_2O_3$ // $MnO_2$           | 75                              | 3.125                          | <i>Adv. Mater.</i> 2018, 30, 1706640 |
| Lithiated Graphite         | 1.8                  | -                          | ASC-graphite// Activated carbon     | 68.7                            | 0.017                          | <i>Nat. Mater.</i> 2017, 17, 167     |
| FeOOH                      | 1.2                  | 1066 @ 1 $A g^{-1}$        | ASC- $NiMoO_4$ //FeOOH              | 104                             | 1.27                           | <i>Nat. Commun.</i> 2017, 8, 14264   |
| $Ti_3C_2T_x$               | 0.9                  | 200 @ 2 $V s^{-1}$         | -                                   | -                               | -                              | <i>Nature</i> , 2018, 557, 409       |
| $Ti_3C_2T_x$               | 1.1                  | 420 @ 0.1 $V s^{-1}$       | -                                   | -                               | -                              | <i>Nat. Energy</i> 2017, 2, 17105    |

<sup>a</sup>Holey graphene frameworks. <sup>b</sup>Carbon nanotubes. <sup>c</sup>N-doped ordered mesoporous few-layer carbon.

<sup>d</sup>Nanoporous gold. <sup>e</sup>Graphene/multishelled mesoporous carbon spheres.

## Supplementary Notes

### Note S1. Analysis of the distribution of O vacancy on $Zn_xCo_{1-x}O$ NRs.

As indicated by the EELS characterization (Figs. 2D and 2E), O-vacancies are dominantly present in the region of 2~3 nm from the outermost surface of  $Zn_xCo_{1-x}O$  NRs. Using the peak shift ( $\sim 0.45$  eV) of the two spectra collected for site 1 and site 2 (Fig. 2E), the average O-vacancy concentration on the surface of  $Zn_xCo_{1-x}O$  NR is estimated as  $\sim 22.5\%$ . To validate further this conclusion, the average concentration of O-vacancies ( $\delta_{\text{bulk}}$ ) in bulk  $Zn_xCo_{1-x}O$  NRs was determined by ICP-MS measurement (table S1), which gives the average information about the whole  $Zn_xCo_{1-x}O$  NRs. The relation between the concentrations measured by EELS ( $\delta_{\text{surface}}$ ) and ICP-MS ( $\delta_{\text{bulk}}$ ) can be correlated using the following equation

$$\frac{\delta_{\text{surface}}}{\delta_{\text{bulk}}} = \frac{V_{\text{bulk}}}{V_{\text{surface}}} \Rightarrow \frac{\delta_{\text{surface}}}{\delta_{\text{bulk}}} = \frac{\pi R^2 \cdot h}{\pi(R^2 - (R - 3 \text{ nm})^2) \cdot h} \quad (6)$$

where  $V_{\text{surface}}$  and  $V_{\text{bulk}}$  are the surface-region (about 3 nm from the outermost surface of CoO NRs, shown in fig. S8) and whole volume of  $Zn_xCo_{1-x}O$  NRs,  $R$  and  $h$  is the radius and height of the  $Zn_xCo_{1-x}O$  NRs, respectively. The average radius ( $R$ ) of  $Zn_xCo_{1-x}O$  NRs is estimated as 40 nm (Fig. 2A and fig. S4). For  $Zn_{0.04}Co_{0.96}O$  NRs, the value of  $\delta_{\text{bulk}}$  is 0.034. Hence, based on the above equation,  $\delta_{\text{surface}}$  is calculated as 23.5%, which is close to what was observed by EELS (22.5%). Therefore, the O-vacancies on  $Zn_xCo_{1-x}O$  NRs are indeed mostly distributed in the surface-region with high concentration, while the interior of  $Zn_xCo_{1-x}O$  NRs show negligible O-vacancies. As discussed in the main text, there is a large O-vacancy concentration gradient between the surface-region and interior of  $Zn_xCo_{1-x}O$  NRs. According to the Fick's second law (J. Philibert, Atomic Movements—Diffusion and Mass Transport in Solids, 1991, Les Édition de Physique), time ( $t$ ) and position ( $x$ ) independent diffusivity in one dimension are connected by the ordinary partial differential equation

$$\frac{\partial c(t, x)}{\partial t} = D \frac{\partial^2 c(t, x)}{\partial x^2} \quad (7)$$

where  $c$  is concentration of diffusion ions and  $D$  is the diffusion coefficient. The large O-vacancy concentration gradient,  $\frac{\partial^2 c(t,x)}{\partial x^2}$ , results in fast O-vacancy diffusion,  $\frac{\partial c(t,x)}{\partial t}$ .

**Note S2. Estimation of the theoretical capacitance of P-Zn<sub>x</sub>Co<sub>1-x</sub>O NRs.**

It is assumed that the double layer capacitance ( $C_{dl}$ ) and redox pseudocapacitance ( $C_{redox}$ ) are responsible for the capacity of P-Zn<sub>x</sub>Co<sub>1-x</sub>O NRs. For  $C_{dl}$ , taking into account the Brunauer-Emmet-Teller (BET) surface area of  $\sim 91 \text{ m}^2 \text{ g}^{-1}$ , the surface-normalized capacitance is approximately  $60 \text{ } \mu\text{F cm}^{-2}$  for Zn<sub>x</sub>Co<sub>1-x</sub>O film. Therefore,  $C_{dl}$  for P-Zn<sub>x</sub>Co<sub>1-x</sub>O NRs should be about  $55 \text{ F g}^{-1}$ . For  $C_{redox}$ , it is assumed that low index facets, {100}, {110} and {111} are equally distributed on the surface of P-Zn<sub>x</sub>Co<sub>1-x</sub>O NRs. For simplicity, we analyzed {100}, {110} and {111} of CoO. Therefore, the area per Co atom on the specific facet (fig. S13) can be calculated as

$$S_{\text{Co-}\{100\}} = \frac{a^2}{2} \quad (8)$$

$$S_{\text{Co-}\{110\}} = \frac{\sqrt{2}a^2}{2} \quad (9)$$

$$S_{\text{Co-}\{111\}} = \frac{\sqrt{3}/2a^2}{2} \quad (10)$$

where  $a$  is the lattice parameter of CoO ( $a=4.2612 \text{ \AA}$ ). Hence, the total number of Co atoms exposed on the surface of per gram of P-Zn<sub>x</sub>Co<sub>1-x</sub>O NRs can be estimated as follows

$$N = S_{\text{BET}} \times \left( \frac{1/3}{S_{\text{Co-}\{100\}}} + \frac{1/3}{S_{\text{Co-}\{110\}}} + \frac{1/6}{S_{\text{Co-}\{111\}}} \right) \quad (11)$$

where  $S_{\text{BET}}$  is the BET surface of P-Zn<sub>x</sub>Co<sub>1-x</sub>O NRs. It should be noted that {111} facets of CoO are polar, which can be terminated by Co or O atoms. Therefore, the Co-terminated facets account for 1/6 fraction of the total surface area of P-Zn<sub>x</sub>Co<sub>1-x</sub>O NRs. Assuming the Co oxidation state

change of surface Co atom is 2, the theoretical redox capacitance of P-Zn<sub>x</sub>Co<sub>1-x</sub>O NRs was estimated by using the following equation

$$C_{\text{redox}} = \frac{2 \times (N / N_A) \times M_{\text{Zn}_x\text{Co}_{1-x}\text{O}} \times F}{\Delta V \times M_{\text{Zn}_x\text{Co}_{1-x}\text{O}}} \quad (12)$$

where  $N_A$  is Avogadro constant,  $F$  is Faraday's constant (96485.3383 C mol<sup>-1</sup>),  $\Delta V$  is the potential sweep range, and  $M_{\text{Zn}_x\text{Co}_{1-x}\text{O}}$  is the molar mass of Zn<sub>x</sub>Co<sub>1-x</sub>O.

In the potential window of -1~-0.2 V<sub>Ag/AgCl</sub>, the redox pseudocapacitance of P-Zn<sub>x</sub>Co<sub>1-x</sub>O NRs is negligible, because the two pairs of redox peaks related to Co<sup>2+</sup>/Co<sup>3+</sup> and Co<sup>3+</sup>/Co<sup>4+</sup> are located at potentials positive than -0.2 V<sub>Ag/AgCl</sub> (fig. S25A). Therefore, the total charge storage can be estimated as

$$C_{\text{total}} \approx C_{\text{dl}} = 55 \text{ F g}^{-1} \quad (13)$$

As shown in Fig. 3A and 3B, and fig. S12, the measured capacity for P-Zn<sub>x</sub>Co<sub>1-x</sub>O NRs is ~34 F g<sup>-1</sup>, is consistent with the estimated value, indicating that the double-layer capacitance dominates in the potential window studied.

In the potential window of -0.15-0.45 V<sub>Ag/AgCl</sub>, the total capacity of P-Zn<sub>x</sub>Co<sub>1-x</sub>O NRs can be estimated as

$$C_{\text{total}} = C_{\text{dl}} + C_{\text{redox}} = 462 \text{ F g}^{-1} \quad (14)$$

As shown in fig. S25B, this value is in agreement with the experimentally observed maximum capacity (345 F g<sup>-1</sup>).

### **Note S3. Estimation of the theoretical capacitance of Zn<sub>x</sub>Co<sub>1-x</sub>O NRs.**

As revealed by Co-L<sub>2,3</sub> edge XAS analysis (fig. S19), the average Co oxidation state change for CoO NRs, Zn<sub>0.04</sub>Co<sub>0.96</sub>O NRs, and Zn<sub>0.06</sub>Co<sub>0.94</sub>O NRs is about 0.46, 0.74, and 0.72, respectively (i.e. by 0.46, 0.74, and 0.72 e<sup>-</sup> per Co atom, respectively), in the potential window of -1 ~ -0.2 V<sub>Ag/AgCl</sub> (Fig. 4C). Correspondingly, the pseudocapacitance of CoO, Zn<sub>0.04</sub>Co<sub>0.96</sub>O and Zn<sub>0.06</sub>Co<sub>0.94</sub>O NRs can be calculated as 742, 1187, 1153 F g<sup>-1</sup>, respectively, based on the equation

$$C_{\text{pseudo}} = \frac{n \times F}{\Delta V \times M_{\text{Zn}_x\text{Co}_{1-x}\text{O}}} \quad (15)$$

where  $n$  is the number of moles of charge transferred per mole of  $\text{Zn}_x\text{Co}_{1-x}\text{O}$  NRs,  $F$  is Faraday's constant ( $96485.3383 \text{ C mol}^{-1}$ ),  $\Delta V$  is the potential window, and  $M_{\text{Zn}_x\text{Co}_{1-x}\text{O}}$  is the molar mass of  $\text{Zn}_x\text{Co}_{1-x}\text{O}$  NRs. On the other side, considering the BET surface area of  $\sim 30 \text{ m}^2 \text{ g}^{-1}$  for  $\text{Zn}_x\text{Co}_{1-x}\text{O}$  NRs, the value of  $C_{\text{dl}}$  should be about  $18 \text{ F g}^{-1}$ , representing a very small contribution to the total charge storage. Therefore, the capacitive charge storage occurs dominantly by oxidation of Co ions in the bulk  $\text{Zn}_x\text{Co}_{1-x}\text{O}$  NRs, which is accomplished by intercalation of oxygen ions (Fig. 4A and fig. S18).

For  $\text{Zn}_{0.04}\text{Co}_{0.96}\text{O}$  NRs, the oxidation of cobalt ions to  $\text{Co}^{3+}$  occurs at  $\sim 0 \text{ V}_{\text{Ag}/\text{AgCl}}$  (fig. S25A). The Co oxidation state change per Co atom in  $\text{Zn}_{0.04}\text{Co}_{0.96}\text{O}$  NRs from  $-1$  to  $-0.1 \text{ V}_{\text{Ag}/\text{AgCl}}$  should be  $0.89 \bar{e}$ . If we assume the oxidation of cobalt ions during this potential range at the same rate, the Co oxidation state change per Co atom from  $-1$  to  $-0.2 \text{ V}_{\text{Ag}/\text{AgCl}}$  should be  $0.79 \bar{e}$ , thus the corresponding theoretical capacity for  $\text{Zn}_{0.04}\text{Co}_{0.96}\text{O}$  NRs should be  $1267 \text{ F g}^{-1}$ . The experimentally obtained capacity for  $\text{Zn}_{0.04}\text{Co}_{0.96}\text{O}$  NRs is approaching this theoretical limit. Following this atomic engineering route, it is predicted that further capacity enhancement can be realized by multi-element doping and/or decreasing the crystal size of oxide. Assuming the net Co oxidation state change per Co atom in  $\text{Zn}_x\text{Co}_{1-x}\text{O}$  NRs is  $2 \bar{e}$  (from  $+2$  to  $+4$ ), the potential window is  $1.1 \text{ V}$  (from  $-1$  to  $0.1 \text{ V}_{\text{Ag}/\text{AgCl}}$ ), the calculated capacity is  $2341 \text{ F g}^{-1}$  based on equation (15).

#### **Note S4. Analysis of the oxygen intercalation mechanism in $\text{Zn}_x\text{Co}_{1-x}\text{O}$ NRs.**

As discussed in the main text, the dominant charge storage mechanism in  $\text{Zn}_x\text{Co}_{1-x}\text{O}$  NRs is oxygen intercalation instead of surface redox reactions, which is supported by the following experimental evidence. First, the surface redox reactions of CoO during charge and discharge process (*Energy Environ. Sci.*, 2011, 4, 4496-4499)

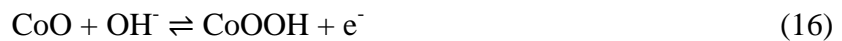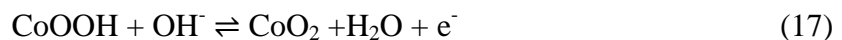

take place in the potential range from  $-0.1 \sim 0.4 \text{ V}_{\text{Ag}/\text{AgCl}}$  (fig. S25A), which is more positive than the potential window studied for  $\text{Zn}_x\text{Co}_{1-x}\text{O}$  NRs in Fig. 3A ( $-1 \sim -0.2 \text{ V}_{\text{Ag}/\text{AgCl}}$ ). Moreover, the main cobalt oxidation state of  $\text{Zn}_x\text{Co}_{1-x}\text{O}$  NRs after cycling test remained at about 2 (fig. S15A). Second, the insertion of oxygen ions into  $\text{Zn}_x\text{Co}_{1-x}\text{O}$  NRs is observed based on the O-K edge spectra of  $\text{Zn}_x\text{Co}_{1-x}\text{O}$  NRs (Fig. 4A and fig. S18). Notably, the peak A originates from transition of electrons to hole states of Co3d-O2p octahedral coordination (*Chem. Mater.* 2010, 22, 70-76). Due to the presence of a large amount of O-vacancies, peak A for the as-prepared  $\text{Zn}_x\text{Co}_{1-x}\text{O}$  NRs is not obvious, however, it rises up significantly after processing at  $-0.2 \text{ V}_{\text{Ag}/\text{AgCl}}$ , indicating the increased oxygen content in  $\text{Zn}_x\text{Co}_{1-x}\text{O}$  NRs. Third, the average Co oxidation state change for  $\text{Zn}_{0.04}\text{Co}_{0.96}\text{O}$  NRs is  $0.74 \bar{e}$  per Co atom. This demonstrates that the oxygen ions are intercalated into the inner part of  $\text{Zn}_x\text{Co}_{1-x}\text{O}$  NRs because their surface area is relatively low ( $\sim 30 \text{ m}^2 \text{ g}^{-1}$ ). Last, the small difference in the Co oxidation state change between  $\text{Zn}_{0.04}\text{Co}_{0.96}\text{O}$  and  $\text{Zn}_{0.06}\text{Co}_{0.94}\text{O}$  NRs accords well with the tiny difference in the O-vacancy concentrations (table S1). Therefore, the capacitive charge storage in  $\text{Zn}_x\text{Co}_{1-x}\text{O}$  NRs occurs dominantly through a mechanism of oxygen intercalation rather than surface redox reactions.

## Supplementary Methods

**Materials Characterizations.** XRD characterization was carried out using a Bruker D8 advance XRD. XPS analysis was performed using a Kratos Axis Ultra DLD with a monochromatic Al (K $\alpha$ ) radiation source. M-S plots were performed on a Versastat 3 potentiostat electrochemistry workstation with a frequency of 1000 Hz.

**Electrochemical performance calculations.** Gravimetric-specific capacitance ( $C_m$ ) of electrode materials was calculated from the CV curves by integrating the cathodic sweep using the following equation

$$C_m = \frac{1}{mv|V_a - V_b|} \int_{V_b}^{V_a} i(V)dV \quad (18)$$

where  $m$  is the mass loading of the electroactive material on the electrode,  $v$  is the scan rate,  $V_a$  and  $V_b$  are the cathodic and anodic potential, respectively, and  $i(V)$  is the current response at a specific potential  $V$ .

Energy density ( $E$ ) was calculated using the following equation

$$E = \frac{1}{2} CV^2 \quad (19)$$

where  $C$  is the capacitance of the material and  $V$  is the potential window of the cell.

Power density ( $P$ ) was calculated using the following equation

$$P = \frac{E}{t} \quad (20)$$

where  $t$  is the discharge time.

**Computational methods.** Density functional theory plus U (DFT+U) calculations were carried out using projector augmented wave (PAW) (*Phys. Rev. B* 1999, 59, 1758-1775; *Phys. Rev. B* 1994, 50, 17953-17979) pseudopotential and the Perdew-Burke-Ernzerhof (PBE) exchange-correlation functional (*Phys. Rev. Lett.* 1996, 77, 3865-3868), as implemented in the Vienna Ab-initio Simulation Package (VASP) (*Phys. Rev. B* 1993, 47, 558-561; *Comput. Mater. Sci.* 1996, 6,

15-50). For a better description of the Co 3d electrons, an effective U parameter of 3.7 eV under the approximation introduced by Dudarev *et al.* (*Phys. Rev. B* 1998, 57, 1505-1509) was applied. All calculations were carried out using a plane wave kinetic energy cut-off of 400 eV. All structures in the calculations were spin-polarized and relaxed until the convergence tolerance of force on each atom was smaller than 0.05 eV. The energy converge criteria was set to be  $10^{-5}$  eV for self-consistent calculations with a gamma-centre 2x2x1 *k*-mesh. The computational unit cells to investigate O-vacancy diffusion barriers through different surfaces are shown in fig. S20. For both {111} and strained {111} structures, one H layer was introduced to make the slab to obey the electron counting rule, which is a common method used for polar surfaces (*J. Phys.: Condens. Matter.* 2014, 26, 315014; *J. Chem. Phys.* 2013, 139, 124704). The energy barrier was located via searching for transition states by climbing image nudged-elastic band (CI-NEB) method (*J. Chem. Phys.* 2000, 113, 9901-9904) implemented in VASP. The transition states were obtained by relaxing the force below  $0.05 \text{ eV } \text{\AA}^{-1}$ . Note that the located transition states were further confirmed by frequency analysis.
